**Fibroblasts from metastatic sites induce broad-spectrum drug desensitization via modulation of mitochondrial priming**

Benjamin D. Landry<sup>1</sup>, Thomas Leete<sup>1</sup>, Ryan Richards<sup>1</sup>, Peter Cruz-Gordillo<sup>1</sup>, Gary Ren<sup>1</sup>,  
Alyssa D. Schwartz<sup>2</sup>, Shelly R. Peyton<sup>2</sup>, Michael J. Lee<sup>1,#</sup>

<sup>1</sup> Program in Systems Biology; Program in Molecular Medicine; and Department of Molecular, Cell and Cancer Biology

University of Massachusetts Medical School

Worcester, MA 01605

<sup>2</sup> Department of Chemical Engineering

University of Massachusetts, Amherst

Amherst, MA 01003

# To whom correspondence should be addressed: [michael.lee@umassmed.edu](mailto:michael.lee@umassmed.edu)

## **ABSTRACT**

Due to tumor heterogeneity, most believe that effective treatments should be tailored to the features of an individual tumor or tumor subclass. It is still unclear what information should be considered for optimal disease stratification, and most prior work focuses on tumor genomics. Here, we focus on the tumor micro-environment. Using a large-scale co-culture assay optimized to measure drug-induced cell death, we identify tumor-stroma interactions that modulate drug sensitivity. Our data show that the chemo-insensitivity typically associated with aggressive subtypes of breast cancer is not cell intrinsic, but rather a product of tumor-fibroblast interactions. Additionally, we find that fibroblast cells influence tumor drug response in two distinct and divergent manners, which were predicable based on the anatomical origin from which the fibroblasts were harvested. These divergent phenotypes result from modulation of “mitochondrial priming” of tumor cells, caused by secretion of inflammatory cytokines, such as IL6 and IL8, from stromal cells.

## 1 INTRODUCTION

2 DNA damaging agents continue to be used as frontline therapies in the treatment of most  
3 forms of cancer. These therapies are effective in many cases; however, sensitivity is extremely  
4 variable, even amongst tumor cells of a single stratified subtype (Fry et al., 2008). For instance,  
5 “triple-negative” breast cancers (TNBCs) – a subtype defined only by the lack of estrogen and  
6 progesterone receptor expression, and lack of HER2 amplification – are the most chemo-sensitive  
7 subtype of breast cancer, but also the subtype with the shortest disease-free survival and lowest  
8 overall survival rates (Anders and Carey, 2008; Carey et al., 2007). This paradox is thought to result  
9 from heterogeneity within the TNBC subclass. Recent studies have highlighted that TNBC is likely  
10 not a single disease, but rather an amalgamation of several distinct diseases (Lehmann et al.,  
11 2011). Nonetheless, although many tumor subtypes like TNBC are now known to be  
12 heterogeneous, it remains unclear which features of this heterogeneity are responsible for creating  
13 the variable chemosensitivity that is observed.

14 The study of tumor heterogeneity has generally focused on the genomics of tumor cells  
15 (Cancer Genome Atlas Network, 2012; Cancer Genome Atlas Network et al., 2012; Shah et al.,  
16 2012). Several studies now exist that have explored the relationship between tumor genetics or  
17 tumor gene expression and drug response (Barretina et al., 2012; Cohen et al., 2011; Lamb et al.,  
18 2006; Li et al., 2017). Many insights have been gained from these and other studies, but even  
19 collectively, these studies fail to create a clear understanding of the variable levels of sensitivity to  
20 commonly used chemotherapeutics (Innocenti et al., 2011; Jiang et al., 2016). An important  
21 consideration is that substantial non-genetic heterogeneity exists within tumors, and these  
22 influences are generally missed in studies that focus exclusively on tumor genomics. For instance,  
23 several classes of normal cells typically reside within tumors, and in some cases these have been  
24 demonstrated to alter tumor cell behavior, including sensitivity to drugs (Pallasch et al., 2014).

25 It is increasingly recognized that many tumor phenotypes, including tumor initiation,  
26 epithelial to mesenchymal transition (EMT), and metastatic potential, are the influenced by

27 interactions between cancer cells and the fibroblasts residing within or near tumor cells (Kalluri and  
28 Zeisberg, 2006). The role of these interactions in drug sensitivity has been explored using *in vitro*  
29 co-culture systems, in which cancer cell specific expression of luciferase (Mcmillin et al., 2010) or  
30 GFP (Straussman et al., 2012) was used to specifically quantify tumor cell drug sensitivity in the  
31 presence or absence of other stromal cell types. These studies revealed that stromal fibroblasts are  
32 a common, sometimes potent, modulator of drug sensitivity, generally resulting in de-sensitization  
33 or drug resistance. Additionally, these large-scale studies have revealed significant variability in the  
34 nature of the tumor-stroma interactions, in which the drug sensitivity of cancer cells appears to  
35 depend on the particular combination of tumor cell, stromal cell, and drug used (Mcmillin et al.,  
36 2010).

37 Here, we develop a mixed co-culture assay optimized to specifically quantify cell death  
38 rather than cell proliferation, and use this assay to characterize functional interactions between  
39 tumor cells, stromal cells, and anti-cancer chemotherapeutic agents. Our work reveals two  
40 previously unappreciated principles by which stromal fibroblasts alter the tumor's drug response.  
41 First, our study finds that the drug insensitivity associated with some aggressive subtypes of breast  
42 cancer is not a cell intrinsic property, but rather a product of tumor-fibroblast interactions. Second,  
43 we find that fibroblast cells influence tumor drug response in two distinct and divergent manners,  
44 which were predicable based on the anatomical origin from which the fibroblasts were harvested.  
45 Specifically, we found that fibroblasts harvested from locations that are common sites of breast  
46 cancer metastasis – bone, liver, lung, or brain – promote broad-spectrum drug resistance.  
47 Conversely, fibroblasts from locations that do not typically harbor metastatic breast cancer – such  
48 as the uterus or skin – promote broad-spectrum drug sensitization. Mechanistically, these fibroblast-  
49 dependent phenotypes result from modulation of mitochondrial “priming”, which changes the  
50 threshold for initiation of apoptosis in cancer cells. Furthermore, we find that the interaction between  
51 tumor cells and fibroblasts occurs through inflammatory cytokines, such as IL6 and IL8, which are  
52 secreted by fibroblasts and potently augment tumor cell drug sensitivity. Taken together, our study

53 highlights the tumor micro-environment as an important source of drug resistance for aggressive  
54 breast cancers, and reveals new strategies for sensitizing these cells to conventional  
55 chemotherapies.

56

## 57 **RESULTS**

58

### 59 **Cell intrinsic sensitivity to commonly used chemotherapy is similar for basal-like and** 60 **mesenchymal-like TNBC cells**

61 In the use of molecularly targeted therapies, genetic stratification has led to significant  
62 improvements in treatment efficacy (Al-Lazikani et al., 2012). In contrast, the use of DNA-damaging  
63 agents is not typically informed by genomic or gene expression features, and instead are selected  
64 based on the anatomical origin of the disease. Based on prior genetic studies, several mutations  
65 have been identified that alter DNA damage sensitivity, but these are generally restricted to those  
66 that alter drug availability or mutations that directly affect DNA repair (Innocenti et al., 2011; Yard et  
67 al., 2016). To identify a more complete understanding of the molecular features that contribute to  
68 variation in DNA damage sensitivity, we focused on TNBC cells, due to the known variation in drug  
69 response that is observed within this subclass. TNBCs are treated exclusively with DNA damaging  
70 therapies, and responses are variable, even in the absence of mutations known to alter DNA repair  
71 (Lehmann et al., 2011).

72 To highlight this variability in the drug response, we selected a panel of ten TNBC cells from  
73 either the “basal-like” or “mesenchymal-like” expression classes (Heiser et al., 2009; Lehmann et al.,  
74 2011; Perou et al., 2000). Basal-like (BL) cells – sometimes referred to as “Basal A”, “Basal-like 1”,  
75 and “Basal-like 2” – are defined by expression of basal or myoepithelial genes. These cells are  
76 highly proliferative, tend to have elevated expression of DNA damage response genes, and  
77 generally respond at higher rates to cytotoxic chemotherapies (Lehmann et al., 2011).  
78 Mesenchymal-like (ML) TNBCs – which includes “Mesenchymal”, “Mesenchymal stem-like”, and

79 also “claudin-low” expression classes – are enriched for expression of genes related to EMT, and  
80 genes associated with stemness. These cells are more “aggressive” clinically, more de-  
81 differentiated, more metastatic, and more chemo-resistant *in vivo* (Lehmann et al., 2011; Prat et al.,  
82 2010). Thus, we reasoned that identifying mechanisms which account for the variability in DNA  
83 damage sensitivity between the BL and ML classes may aid in patient stratification or help to create  
84 new strategies for improving responses to these agents.

85 We first profiled the response of TNBC cells to doxorubicin (also called Adriamycin), a  
86 topoisomerase II inhibitor that is commonly given to TNBC patients. Since doxorubicin is given as  
87 frontline therapy to all breast cancer patients, we suspected that if the observed clinical patterns of  
88 aggressiveness were due to intrinsic differences in drug sensitivity associated with these  
89 expression states, different levels of sensitivity to this drug should be observed *in vitro*. Indeed, the  
90 least sensitive cells were HCC-1395, a TNBC of the ML expression state; the most sensitive cells  
91 were MDA-MB-468, a TNBC in the chemo-sensitive BL category (Figure 1A). In contrast, however,  
92 the rest of the cell lines tested were similarly sensitive to doxorubicin, regardless of their gene  
93 expression state. To see if this was unique to doxorubicin, we also profiled responses to other Topo  
94 I and II inhibitors in this panel of cells. Overall, these data reveal relatively similar levels of drug  
95 sensitivity across these 10 cell lines (Supplemental Figure 1A). For example, for most of the drugs  
96 tested, the EC<sub>50</sub> values for at least 8 of the 10 cells were within technical error range of our assay.  
97 Furthermore, for all drugs except camptothecin, we failed to observe any obvious separation  
98 between BL and ML cells. To more rigorously determine if the patterns of sensitivity to these drugs  
99 could be used to distinguish BL versus ML cells, we performed hierarchical clustering using either  
100 the EC<sub>50</sub> or the maximum effect observed for each drug. This analysis also failed to separate these  
101 two expression states based on their observed drug sensitivity profile (Figure 1B and Supplemental  
102 Figure 1B). Finally, we also analyzed data publically available through the LINCS consortium, which  
103 include drug sensitivities for a larger panel of 27 BL or ML cell lines. These data also show that BL  
104 and ML cells have similar levels of sensitivity to topoisomerase inhibitors, specifically, or to all anti-

105 cancer drugs, generally (Figure 1C). Thus, our data suggest that the differences in DNA damage  
106 chemo-sensitivity that are commonly observed for BL and ML tumors *in vivo* are not an intrinsic  
107 property associated with the BL and ML expression states of these cells.

### 108 109 **Co-culture screen to identify environmental influences on drug sensitivity**

110 Based on the results of our *in vitro* drug screen of TNBC cells grown in standard mono-  
111 culture conditions, we sought to identify cell non-autonomous sources that may affect sensitivity to  
112 DNA damaging agents. Several recent studies have suggested that interactions between tumor  
113 cells and components of the tumor micro-environment – including extracellular matrix, growth  
114 factors, and other stromal cell types – can alter sensitivity to chemotherapy (Nguyen et al., 2014;  
115 Straussman et al., 2012; Weaver et al., 2002). We focused on interactions between cancer cells  
116 and stromal fibroblasts, which are often the predominant stromal type found within tumors.  
117 Fibroblast infiltration has prognostic and predictive significance in many cancers, generally  
118 associated with poor outcomes (Kalluri and Zeisberg, 2006). Moreover, fibroblasts are well known  
119 to supply growth factors and matrix proteins, which may alter how cells respond to DNA damage  
120 (Lee et al., 2012).

121 To identify interactions between tumor cells and stromal fibroblasts that alter drug response,  
122 we used an *in vitro* co-culture system that was successfully used to study tumor-stroma interactions  
123 in other contexts (Straussman et al., 2012). In this experimental platform cancer cells are  
124 genetically modified to express GFP, which facilitates rapid, quantitative, high-throughput, and  
125 cancer cell specific measurement of drug response dynamics. We piloted this study using BT-20  
126 TNBC cells, either grown in mono-culture or in co-culture with HADF, a primary non-immortalized  
127 human fibroblast cell harvested from the adrenal gland. We determined  $\alpha$ -smooth muscle actin  
128 (SMA) expression, a marker of the “activated fibroblast” expression state, which is commonly  
129 observed in fibroblasts associated with tumors (also called Cancer Associated Fibroblasts, or CAFs,  
130 and myofibroblasts). Immunofluorescence microscopy experiments confirmed that SMA expression

131 in HADF cells is generally low and variable when these cells are grown in mono-culture. SMA  
132 expression is increased in HADF cell co-cultured with BT-20 TNBC cells, and a similar pattern was  
133 observed for other primary fibroblasts (Supplemental Figure 2). For our pilot drug screen, these  
134 cells were exposed to one of two drugs: erlotinib, a small molecule EGFR inhibitor, or camptothecin,  
135 a potent Topo I inhibitor (Supplemental Figure 3A). Erlotinib does not kill BT-20 cells but does  
136 induce a transient growth arrest (i.e. cytostasis), whereas camptothecin potently kills BT-20 cells  
137 (i.e. cytotoxicity) (Lee et al., 2012). Total well fluorescence measured using a fluorescence plate  
138 reader revealed that co-culture with HADF enhanced the proliferation rate of BT-20 cells to a small  
139 extent. Furthermore, we found that co-culture with HADF potently blocked erlotinib-mediated  
140 cytostasis of BT-20 cells, but had no effect on camptothecin sensitivity. Notably, well-based  
141 fluorescence failed to capture the potent death that we observe by other methods following  
142 camptothecin exposure, with all measurements in the time course recording higher values than the  
143 initial pre-drug measurement (Supplemental Figure 3A and 1A). We were concerned that this  
144 reflected a poor sensitivity of this assay, particularly with respect to quantifying the degree of  
145 cytotoxicity rather than proliferation. Thus, 96 hours after drug exposure, we collected images of  
146 these wells using fluorescence microscopy and quantified cell numbers from these images using a  
147 CellProfiler-based automated analysis pipeline (Lamprecht et al., 2007). Our quantitative image  
148 analysis confirmed the growth rate increase induced by HADF, as well as the loss of erlotinib-  
149 induced cytostasis in HADF co-culture (Supplemental Figure 3B). Importantly, however, image  
150 analysis revealed a strong stromal interaction that was not observed by well-based fluorescence  
151 measurements. Less than 1% of BT-20 cells survived chronic camptothecin exposure if grown in  
152 mono-culture, but roughly 25% of these cells survived in the presence of HADF (Supplemental  
153 Figure 3C). Taken together, these data indicate that well-based measurement of GFP fluorescence  
154 is appropriate for quantifying changes to proliferation, but not sufficient for quantifying the degree of  
155 cell death in a population of cells.

156



157 **Co-culture screen optimized to monitor cytotoxicity reveals widespread stromal influence on**  
158 **TNBC drug sensitivity**

159 Because we were primarily focused on the study of cytotoxic DNA damaging agents, we  
160 aimed to modify our co-culture screen design to optimize measurement of cell death. We used JC-  
161 1, a dye that accumulates within mitochondria and is often used as a surrogate measure of  
162 apoptotic cell death (Figure 2A and B) (Montero et al., 2015). At low concentrations, this dye exists  
163 as a monomer and yields green fluorescence, however, when accumulated at high concentrations  
164 within mitochondria, this dye forms aggregates, which yield orange/red fluorescence. Thus, the red  
165 fluorescence of the JC-1 dye reports cellular mitochondrial integrity, which is lost when cells  
166 activate apoptosis. To assess the suitability of JC-1 to quantify modulation in the degree of cell  
167 death, we again piloted this assay on BT-20 cells treated with camptothecin in the presence or  
168 absence of HADF. Images of these cells taken prior to drug exposure confirm punctate red  
169 fluorescence in BT-20, but not HADF, confirming that the dye is not exchanged between cells in co-  
170 culture (Figure 2B). 96 hours after exposure to camptothecin, the majority of BT-20 cells had  
171 significantly reduced JC-1 red fluorescence, suggesting that mitochondrial integrity has been  
172 compromised (Figure 2C). Importantly, JC-1 red fluorescence measured using a fluorescence plate  
173 reader was sufficiently sensitive for observing both the potent cell death of BT-20 cells in mono-  
174 culture, and the protective effect of HADF cells in co-culture (Figure 2D).

175 To evaluate the role of stromal fibroblasts in DNA damage sensitivity, we selected six TNBC  
176 cell lines (3 BL and 3 ML) that have relatively similar levels of sensitivity to DNA damage. These  
177 JC-1 labeled TNBC cells were grown in mono-culture or in co-culture with each of a panel of 16  
178 primary human fibroblasts. Each culture was exposed to increasing doses of 42 anticancer drugs  
179 (at least one drug per class for all current FDA approved breast cancer drugs, Supplemental Tables  
180 1 and 2). JC-1 red fluorescence was quantified at 8 hour intervals for 72 hours. In total, we collected  
181 more than 300,000 measurements of drug sensitivity (Figure 2E and Supplemental Table 3). We  
182 found a strong overall correlation among biological replicates, indicating that the stromal influences

183 observed were not due to measurement noise (Supplemental Figure 4). To identify TNBC-fibroblast  
184 interactions that significantly altered sensitivity, we used a statistical fold-change cut-off of 3x the  
185 standard deviation observed among replicates. This analysis identified 5039 significantly changed  
186 drug responses (Supplemental Figure 4D). This list of “hits” was significantly depleted for responses  
187 at early times (i.e. 8 hours), low doses (0.1  $\mu$ M), and responses to anti-estrogen drugs  
188 (Supplemental Table 4). Non-response to anti-estrogen compounds is expected as TNBCs do not  
189 express estrogen or progesterone receptors.

190 The majority of TNBC cell-fibroblast interactions did not alter drug sensitivity (Supplemental  
191 Figure 4A-B). Nonetheless, our screen revealed many striking phenotypes, which strongly altered  
192 drug sensitivity in both positive and negative directions. To determine the reliability of these  
193 measurements, we selected both strong and moderate phenotypes to validate by flow cytometry.  
194 For example, our screen identified that palbociclib killed more than 80% of HCC-1143 cells, a  
195 Basal-Like TNBC, if applied to these cells in mono-culture. However, this drug was rendered  
196 ineffective when HCC-1143 cells were co-cultured with the fibroblast cell, HCPF, resulting in only a  
197 20 – 40% decrease in cell viability (orange dots in Figure 2E). A flow cytometry based analysis of  
198 cell death recapitulated this drug desensitization phenotype (Figure 2F and G). Additionally, our co-  
199 culture screen identified instances in which the efficacy of etoposide is improved in co-culture  
200 conditions. For example, etoposide was ineffective in killing Mesenchymal-Like Hs578T cells in  
201 mono-culture, but killed more than 50% of these cells grown in co-culture with skin fibroblast cells,  
202 WS1 (purple dots in Figure 2E). This phenotype was interesting because our prior studies have  
203 found that etoposide, a Topo II inhibitor, is minimally active in mono-culture, which was surprising  
204 given the clinical utility of this compound (Lee et al., 2012). Flow cytometry based analysis of cell  
205 death confirmed that etoposide induced cell death in Hs578T is significantly enhanced by co-culture  
206 with WS1 fibroblast (Figure H-I).

207

208 **Principal Component Analysis highlights TNBC-fibroblast interactions as critical**  
209 **determinants of drug sensitivity**

210 Prior studies that have interrogated fibroblast-tumor cell-drug interactions have found that  
211 these interactions generally result in drug resistance, with rare instances in which stromal cell  
212 interactions lead to drug sensitization (Mcmillin et al., 2010; Straussman et al., 2012). Mechanisms  
213 that contribute to this directional variability have not been identified, likely because few drug  
214 sensitizing phenotypes had been previously found. In contrast, our screen reveals that fibroblasts  
215 sensitize and de-sensitize TNBC drug response with similar frequencies (Supplemental Figure 4B).  
216 Thus, we reasoned that a statistical analysis of our data could reveal which influences account for  
217 the observed directional variation. We sought to determine if certain TNBC cells, fibroblast cells, or  
218 drugs were intrinsically more likely to be involved in sensitizing or de-sensitizing interactions  
219 (Supplemental Figures 5-7). Indeed, we found that some TNBC cells (e.g. MDA-MB-468), drugs  
220 (e.g. sunitinib), or fibroblasts (e.g. WS1) appear to be involved in directionally biased interactions.  
221 However, we wanted to integrate these insights to determine the relative importance of each of  
222 these features in our dataset.

223 We performed principal component analysis (PCA) on our screening data. PCA uses the  
224 correlation structure of the data to reduce data dimensionality to a smaller number of “principal  
225 components” which maximally capture the variance of the dataset (Janes and Yaffe, 2006). PCA  
226 can be used to generate a simplified description of the observed data, and here, we were  
227 particularly interested in using PCA to quantify the relative contribution of each measured influence  
228 (e.g. specific tumor cells, fibroblasts, drugs, or unique combinations of each) to the overall observed  
229 pattern of data.

230 PCA identified 10 principal components, with the first two components capturing 53% of the  
231 overall variation in the data. The projection of our data onto PC1 and PC2 revealed a clear  
232 separation of BL and ML cells, revealing that TNBC subtype dependent responses account for a  
233 significant portion of the observed pattern (Figure 3A and C). Notably, this expected pattern was not

234 visible in drug response data collected on these TNBC cells grown in mono-culture (Figure 1B and  
235 3B-C). Thus, PCA suggest that differences in chemosensitivity that are commonly observed  
236 between BL and ML subtypes of TNBC are not a cell intrinsic property, but rather a product of  
237 interactions between TNBC cells and stromal components such as fibroblasts.

238 Another important insight derived from PCA of TNBCs grown in co-culture was that the  
239 variation associated with BL vs. ML subtypes was captured exclusively on PC2, rather than PC1  
240 (Figure 3C). By definition, PC1 captures information that is unrelated to PC2, and in this dataset,  
241 PC1 captures a three fold greater amount of the data variance compared to PC2 (39% of total  
242 dataset versus 13%). Statistical enrichment analysis revealed that PC1 captures variation  
243 associated with each of the 16 primary fibroblast cells, generally separating fibroblasts derived from  
244 common metastatic sites from those derived from organs not typically associated with breast cancer  
245 metastases (Figure 3D-F, and Supplemental Figure 8B-C). Subsequent principal components –  
246 PC3-10, which collectively account for 25% of the data – were not associated with the dichotomy of  
247 “Met vs. Non-Met” stroma, or “BL vs. ML” TNBCs, but instead were associated with specific tumor  
248 cell line-fibroblast-drug interactions. Taken together, PCA analysis reveals that, while gene  
249 expression states and anatomical location both play strong roles in modulating drug response,  
250 influences induced by fibroblasts account for a greater portion of the response variability than  
251 influences associated with the intrinsic differences between the Basal-like and Mesenchymal-Like  
252 gene expression of tumor cells.

### 253 254 **Anatomical origin of fibroblast dictates the directionality of drug influence**

255 PCA revealed that differences in drug sensitivity were strongly associated with the  
256 anatomical origin of fibroblast cells, but from this analysis it was not clear what aspect of drug  
257 sensitivity was associated with fibroblast origin. In other words, from the PCA data it is not clear if  
258 fibroblasts alter the magnitude of TNBC drug response (correlated X-Y variance), or alternatively,  
259 the degree to which TNBC drug response was altered by co-culture (uncorrelated X-Y variance). To

260 inspect this further, we arrayed all data clustering each unique cancer-fibroblast-drug combination  
261 by dose and time, in order to  
262 highlight conserved fibroblast-dependent influences (Figure 4A). Each data tile was then  
263 subsequently grouped by stromal location and drug, and a map was created for each TNBC cell line  
264 to facilitate visual inspection of the relative influences induced by each fibroblast line. To test  
265 whether fibroblast origin was associated with differences in the magnitude of drug response, we  
266 generated maps using the percent viability in co-culture (i.e. y-axis data from Figure 2E). From  
267 these maps, differences between fibroblast lines were not apparent, suggesting that fibroblast origin  
268 does not alter drug sensitivity magnitude (Supplemental Table 3). Next, to test if fibroblast origin  
269 was associated with the degree to which drug responses were altered in co-culture, we generated  
270 maps using the co-culture:mono-culture response ratio (Figure 4B and Supplemental Figure 9).  
271 From this analysis, a clear difference between fibroblast lines was visible, with fibroblasts derived  
272 from common sites of metastasis generally enhancing survival of TNBCs, whereas those derived  
273 from other organs generally were neutral or enhanced TNBC cell death. Interestingly, these  
274 patterns were observed across nearly all drugs, revealing that the location specific trends were  
275 more robust than drug specific responses. To determine if these visual trends were statistically  
276 robust, we calculated the mean response ratio for each unique cancer-fibroblast-drug combination,  
277 and separated these data by metastatic location (Figure 4C). These data confirmed a statistically  
278 significant difference in the directionality of influence between fibroblasts derived from organs that  
279 are common or uncommon metastatic sites. Additionally, we also performed statistical analyses  
280 including only the 5039 drug responses, which were the largest and most significantly changed  
281 phenotypes (Supplemental Figure 4D). This analysis of extreme “outliers” revealed that, while the  
282 total number of “hits” were similar between metastatic and non-metastatic sites, the directionality of  
283 these hits was significantly different between these groups, and consistent with the insights  
284 generated using average response ratio (Figure 4D). Taken together, these results are consistent  
285 with those from PCA, and further reveal that fibroblasts induced fundamentally opposing influences

286 on the drug response of TNBC cells, largely dependent on the anatomical origin from which the  
287 cells were harvested.

288

289 **Fibroblasts alter TNBC drug response through modulation of the mitochondrial priming**  
290 **state of TNBC cells**

291 Next, we aimed to determine the mechanism by which fibroblasts interact with TNBC cells to  
292 produce divergent and largely drug-independent modulation of drug response. The simplest  
293 mechanism that is consistent with our observations would be that these fibroblasts cause a direct  
294 TNBC cell growth or survival defect, independent of the drugs added (Figure 5A, example i). To test  
295 this, we used GFP-tagged TNBC cells to monitor TNBC specific growth/survival phenotypes. We  
296 found that most fibroblasts cells either did not alter the growth rate of TNBC cells or induced a  
297 modest growth rate increase of TNBC cells grown in co-culture (Figure 5B). Furthermore, for  
298 fibroblasts that consistently sensitized drug response rates in all TNBC cell lines (WS1, C12385, or  
299 HUF), co-culture did not significantly alter growth or survival, suggesting that a fitness or survival  
300 defect does not account for the broad-spectrum drug sensitization seen in co-culture with these  
301 cells. In rare instances co-culture conditions did result in a significant TNBC cell growth rate  
302 decrease, such as seen with MDA-MB-231 cells grown with H6013, a fibroblast derived from lung  
303 tissue (Figure 5B). Notably, the M231-H6013 interaction induced broad-spectrum drug  
304 desensitization (i.e. enhanced survival, see Supplemental Figure 9). Thus, even in the rare  
305 instances in which fibroblast cells mediated fitness defects, growth rate or survival modulation does  
306 not appear to account for the observed pattern of influences on TNBC drug response.

307 A second mechanism by which fibroblast cells could enhance drug efficacy could be by  
308 metabolizing the drugs, creating a more potent or more bioavailable compound (Figure 5A, example  
309 ii). This mechanism was recently reported to explain a microbiome-drug interaction that modulates  
310 toxicity of the chemotherapeutic 5-FU (García-González et al., 2017). To test the role of fibroblast-  
311 mediated drug metabolism, we focused on drugs that activate death through induction of DNA

312 damage. For this set of compounds, drug potency should be proportional to level of  $\gamma$ -H2AX, which  
313 marks sites of DNA double stranded breaks. We quantified  $\gamma$ -H2AX nuclear intensity in the  
314 presence and absence of fibroblast co-culture. These measurements were made at 4 time points  
315 following exposure to teniposide, a Topo II inhibitor similar to doxorubicin, which is used clinically in  
316 the treatment of TNBC (doxorubicin fluorescence limits use of this compound). We used GFP-  
317 labeled TNBC cells to identify TNBC cell nuclei and images were quantified using automated image  
318 analysis (CellProfiler, (Lamprecht et al., 2007)). Overall, we found many cases where fibroblasts  
319 modulated  $\gamma$ -H2AX levels (Figure 5D). Importantly, however, the degree to which  $\gamma$ -H2AX was  
320 modulated by fibroblast cells was poorly correlated with the phenotypic influence of these  
321 fibroblasts (Figure 5D). Furthermore, we inspected the most strongly sensitizing and de-sensitizing  
322 co-culture environments to determine if these extreme cases could be explained by differences in  
323 the apparent drug potency. TNBC nuclear  $\gamma$ -H2AX intensity was similar in BT-20 cells co-cultured  
324 with C12385 and Hs27A, fibroblasts that strongly sensitized and desensitized drug responses,  
325 respectively. Thus, it does not appear that fibroblast influences on drug sensitivity generally occur  
326 through modulation of the drugs themselves.

327         The insights gained from  $\gamma$ -H2AX intensity are also consistent with our general observation  
328 that fibroblast cells influence drug sensitivity in similar ways across diverse classes of drugs. In  
329 other words, it does not appear that the mechanisms by which fibroblast cells influence the drug  
330 responses in TNBC cells are specific to the drug compounds themselves or drug-specific responses  
331 of TNBC cells. Drug-induced cell death is the product of at least two independent influences: the  
332 drug-specific cell response (i.e. the ability of a drug to change a cell from a healthy to a dead state)  
333 and the degree to which the cell is “primed” for death (i.e. how “close” the healthy cell is to dying)  
334 (Chonghaile et al., 2011; Montero et al., 2015). Thus, a third mechanism that we tested was  
335 whether fibroblasts alter the degree of mitochondrial apoptotic priming. We used the BH3 profiling  
336 technique to measure changes in the relative state of mitochondrial priming (Ryan and Letai, 2013).

337 This assay quantifies the amount of recombinant BH3, a pro-apoptotic peptide, required to rupture  
338 mitochondria. We selected five fibroblast cells that produced the strongest and most consistent  
339 modulation of drug sensitivity. The mitochondrial response to BIM peptide was quantified by  
340 monitoring cytochrome c retention by flow cytometry (Figure 5F). BH3 profiling revealed that  
341 fibroblast co-culture conditions significantly altered the mitochondrial priming state of BT-20 and  
342 MDA-MB-231 cells. Furthermore, the degree to which mitochondrial priming was increased or  
343 decreased was also highly correlated with relative drug sensitivity observed in our co-culture screen  
344 (Figure 5G).

345

### 346 **Fibroblast-secreted IL8 induces hyper-sensitivity to DNA damaging chemotherapy**

347 WS1 (skin), C12385 (uterine), and HUF (uterine) cells, sensitized all six TNBC cell lines to  
348 nearly every drug tested. We prioritized understanding mechanisms by which these cells induce  
349 broad-spectrum drug sensitization, as these may be therapeutically relevant insights. To begin, we  
350 determined whether conditioned media from these fibroblast cells also induced drug sensitization.  
351 Conditioned media was collected following 48 hours of culture with fibroblasts and added to TNBC  
352 cells prior to addition of teniposide. To measure the rate of TNBC cell death, we used Sytox green,  
353 a cell impermeant dye that is fluorescent only when bound to DNA. We found that conditioned  
354 media from WS1, HUF, and C12385 sensitized all six TNBC cell lines tested to teniposide (Figure  
355 6A). In contrast, conditioned media from Hs27A, a bone fibroblast cell, generally did not alter TNBC  
356 drug response, although these data were more variable across TNBC cells.

357 To identify secreted factors that are responsible for these phenotypes, we profiled  
358 conditioned media for the presence of 45 common cytokine, chemokine, and growth factors (Figure  
359 6B). We reasoned that the relative secretion profile for factors that induce drug sensitization should  
360 be inversely correlated with the relative drug sensitivity observed in our co-culture screen. Of the 45  
361 cytokines profiled, we observed strong negative correlation only for IL8 (Figure 6C and D).

362 Consistent with this line of reasoning, we also observed a positive correlation between relative drug



363 sensitivity and secretion of IL6, a cytokine that is already known to induce resistance to DNA  
364 damaging chemotherapies (Figure 6D) (Gilbert and Hemann, 2010). To test if IL8 also alters  
365 sensitivity to DNA damage, we again used Sytox green to quantify the rate of cell death.  
366 Recombinant IL8 increased the rate of camptothecin induced cell death by approximately 2.5-fold,  
367 whereas recombinant IL6 decreased the rate of cell death by approximately 2-fold (Figure 6E). To  
368 further determine the role of IL8 secretion in the drug sensitization phenotype observed in  
369 conditioned media, we tested IL8 neutralizing antibodies with conditioned media from WS1, HUF, or  
370 C12385 fibroblasts. In all three cases, IL8 neutralizing antibodies significantly inhibited the drug  
371 sensitization induced by conditioned media (Figure 6F). Notably, IL8 neutralizing antibodies failed to  
372 restore drug sensitivity to the levels observed in the absence of fibroblast conditioned media,  
373 suggesting that other secreted factors also contribute to the drug sensitization phenotype.

374

## 375 **DISCUSSION**

376 In this study, we explored interactions between tumor cells and stromal cells to identify  
377 those that modulate sensitivity to commonly used chemotherapeutics. We found that fibroblasts can  
378 alter drug sensitivity of tumor cells, and that the responses were highly variable, both in magnitude  
379 and in direction. Our statistical analysis clarified that the directional variability in fibroblast influence  
380 is predominantly associated with the anatomical organ from which the fibroblast cells were  
381 harvested. Specifically, fibroblasts from common sites of metastasis typically desensitize tumor cell  
382 drug responses. This interaction was fundamentally different than what was observed with  
383 fibroblasts from organs that do not typically accommodate metastatic growth, which typically  
384 sensitized tumor cell drug responses. Somewhat surprisingly, these influences were consistently  
385 observed, regardless of which drug was applied, which was caused by fibroblast-dependent  
386 modulation of mitochondrial priming within cancer cells. Our analysis of a small set of common  
387 cytokines shows that IL8 and IL6 contribute to drug sensitization and de-sensitization, respectively.

388           The contribution of cancer associated fibroblasts to a variety of tumor phenotypes has been  
389 studied, including using high-throughput co-culture based systems (Mcmillin et al., 2010;  
390 Straussman et al., 2012). Our data, in many respects, reveal phenotypes that are similar to what  
391 has been uncovered in prior high-throughput co-culture based screens. A notable exception is that,  
392 compared to prior studies, our screen revealed a greater proportion of drug sensitizing interactions  
393 between stromal and cancer cells. This difference could have resulted from the depth of our screen,  
394 as strong drug sensitizing phenotypes are also rare in our data. Alternatively, it is also possible  
395 fibroblast mediated drug sensitization is a more common phenotype in TNBC cells, as this cancer  
396 subtype was not deeply profiled in prior studies. Another possibility is that our screening  
397 methodology, which was designed to exclusively monitor drug induced cell death, contributed to the  
398 enhanced resolution of cell death sensitization. In fact, this feature may be likely to play a part given  
399 the limited ability of other approaches to quantify differences in degree of cell death. One important  
400 point regarding our assay is that the use of JC-1 to monitor environmental influences on cell death  
401 left our assay incapable of quantifying other important changes, including alterations to proliferation  
402 rate. Thus, future attempts to study tumor-stroma interactions may benefit from the use of multiple  
403 complementary screening approaches.

404           Nonetheless, the findings from our study have important implications that should be  
405 considered in the context of “personalized” or “precision” medicine. These concepts are explored  
406 typically using genomic analyses of tumor cells. Our data suggest that interactions between tumor  
407 and stromal cells often alter drug sensitivity, and moreover that these interactions are a potentially  
408 more potent source of variation in drug sensitivity than tumor cell gene expression state. Thus, our  
409 data suggest that personalized treatment regimens will ultimately need to consider micro-  
410 environmental features of tumors – and in particular the behaviors of stromal fibroblasts – in  
411 addition to genomic considerations. Furthermore, because fibroblasts appear to have the capacity  
412 for both positive and negative influence in modulating tumor cell drug sensitivity, simple analysis of  
413 their presence or absence is not likely to be robustly informative. Our study identifies inflammatory

414 cytokines such as IL8 and IL6 as key modulators of tumor cell drug sensitivity. Because of the  
415 limited nature of our cytokine screen, it is extremely unlikely that these cytokines explain all, or even  
416 most, of the phenotypes identified in this study. Future studies should focus on identifying a more  
417 comprehensive list of cell non-autonomous features that modulate drug responses in cancer cells.  
418 These insights may be valuable strategies for enhancing drug induced cell death in cancer  
419 treatment.

420 **MATERIALS AND METHODS**

421

422 **Cell lines and reagents**

423 Cell lines BT-20, HCC-1143, Hs-578T, MDA-MB-231, MDA-MB-436, MDA-MB-468, HCC-2157,  
424 HCC-1806, HCC-1395, Hs27A, HS-5, WI-38, IMR-90, Hs 343.T, WS-1 were obtained from  
425 American Type Culture Collection (ATCC) and cell line CAL-120 was obtained from Deutsche  
426 Sammlung von Mikroorganismen und Zellkulturen GmbH (DSMZ). All cell lines were grown in 10%  
427 FBS (Thermofisher Hyclone cat# SH30910.03 lot# AYG161519), 2 mM glutamine, and  
428 penicillin/streptomycin. BT-20, CAL-120, and WS-1 were cultured in Mem $\alpha$  + Earle's Salts. HCC-  
429 1143, HCC-2157, HCC-1806, HCC-1395 were cultured in RPMI 1640 media Hs-578T, MDA-MB-  
430 231, MDA-MB-436, MDA-MB-468, Hs27A, HS-5, Hs 343.T were cultured in Dulbecco's modified  
431 eagles medium (DMEM). Hs578T were further supplemented with 10ug/ml insulin. Primary  
432 fibroblasts, H-6231, H-6201, H-6076, H-6019, and H-6013 were purchased from Cellbiologics;  
433 HCPF, HPF-a, HHSteC, HMF, HAdF, HUF, and HCF-a were purchased from ScienCell; and C-  
434 12385 was purchased from Promocell. Primary fibroblast cells purchased from Cellbiologics,  
435 ScienCell and Promocell were cultured in the media (Sciencell - Fibroblast Medium cat# 2301;  
436 Cellbiologics - Complete Fibroblast Medium /w Kit cat# M2267; Promocell - Fibroblast Growth  
437 Medium 2 cat# C-23020) for 4 doublings before being transitioned to DMEM. All cells were cultured  
438 at 37C in a humidified incubator supplied with 5% CO<sub>2</sub> and maintained at a low passage number  
439 (less than 20 passages for cancer). Prior to expansion and freezing, a small sample of each primary  
440 fibroblast was expanded to determine each cell's Hayflick limit to ensure that experiments could be  
441 performed prior to the onset of replicative senescence. A complete list of drugs used in this study is  
442 included in Supplemental Table 2; antibodies and other reagents used in this study are listed in  
443 Supplemental Table 5.

444

445

446 **Co-culture screen using JC1 dye**

447 Fibroblast cell lines were grown to 80% confluence before being trypsinized, and stained with 5µM  
448 CellTrace Violet Proliferation dye (Thermofisher #C34557) in PBS at a concentration of  $1 \times 10^6$   
449 cell/mL for 15 minutes at 37C. 1500 stained cells were plated in 40µL FluoroBrite media  
450 (Thermofisher # A1896701), supplemented with 10% FBS, 2mM glutamine and  
451 penicillin/streptomycin, in a Greiner clear 384 well plate (#781986) and allowed to adhere for 3  
452 hours. Cancer cell lines were then trypsinized, and stained with 1.5µg/mL (final concentration) JC-1  
453 (Thermofisher # T3168) in FluoroBrite at a concentration of  $1 \times 10^6$  cell/mL for 20 minutes at 37C.  
454 Cancer cells were then plated at 1500 cells in 40uL FluoroBrite per well in the 384 well plate. For  
455 mono-culture conditions, unlabeled cancer cells were added to each well, in order to keep the cell  
456 density consistent with co-culture conditions. Cells were allowed to adhere overnight. The following  
457 morning, 8µL of a 10x drug stock was added to the wells using a VIAFLO 96 Electronic 96-channel  
458 pipette machine. JC-1 fluorescence was then read at 5 spots across each well using a Tecan  
459 M1000 Plate Reader at the excitation wavelength of 535nm +/-17nm and an emission wavelength  
460 of 590nm +/- 17nm every 8 hours for 72 hours. Background fluorescence was determined by  
461 treating labeled cells with Alamethicin, a membrane permeabilizing agent that punctures plasma  
462 membrane and mitochondrial membranes. Fluorescence measurements were normalized relative  
463 to pre-drug treatment values for each well.

464

465 **Cell viability and cell death assays**

466 Cell viability assays were performed either using CellTiter-Glo (cat# G7570), for cells grown in  
467 mono-culture, or flow cytometry, for co-culture assays (other than the co-culture screen, described  
468 above). For CellTiter-Glo, which measures viability as a function of ATP concentration, cells were  
469 plated in Greiner 96 well plates (cat# 655 090) at 5000 cells per well in 100uL of their respective  
470 growth media and allowed to adhere overnight. 10uL of a 10x drug stock, diluted in PBS, was  
471 added to each well. Cells were subsequently allowed to grow at 37C for 72 hours. At 72 hours post

472 drug addition, 33uL of CellTiter-Glo reagent was added to each well. The CellTiter-Glo assay was  
473 performed according to manufacturer's directions, with the reagent diluted 1:3 (relative to media  
474 volume). Luminescence was read using a Tecan M1000 Plate Reader. Cell death measurements to  
475 validate the JC-1 screen data were collected using the Live/Dead Violet reagent (Thermofisher cat#  
476 L34963) and analyzed by flow cytometry. Cancer cells and fibroblast cells were plated at a 1:1 ratio  
477 in DMEM and allowed to adhere overnight. Drugs were added from a 1000x stock and cells were  
478 exposed for the specified times. Cells were trypsinized at the specified times, suspended in PBS at  
479 a concentration of  $1 \times 10^6$  cells per mL and stained with a 1:1000 dilution of the Live/Dead Violet  
480 reagent for 30 minutes on ice. Cells were then fixed with 4% formaldehyde for 10 minutes at room  
481 temperature and run on an LSR II FACS machine with a laser excitation of 405nm and emission of  
482 450nm.

483

#### 484 **Growth rate measurements using GFP labeled cells**

485 To determine cell proliferation rate using a fluorescence plate reader, TNBC cells were stably  
486 transfected with GFP (pRetroQ-AcGFP1-N1). Transfected cells were selected with puromycin (BT-  
487 20 at 1.5µg/mL, 468 at 0.5 µg/mL and 231 at 2 µg/mL). Cells were selected until a parallel non-  
488 transformed plate exposed to puromycin was completely dead. The selected population was  
489 subsequently sorted by FACS to collect cells with similar levels of GFP fluorescence. For co-culture  
490 experiments, fibroblast cell lines were plated at an 8:1, 4:1, 2:1, 1:1, and 1:2 ratio to cancer cells in  
491 a Greiner 96 well plate in 100uL of FluoroBrite media and allowed to adhere for 3 hours. Following  
492 adherence of fibroblast cells, TNBC cells constitutively expressing GFP were plated at a  
493 concentration of 10,000 cells per 100uL of FluoroBrite media and allowed to adhere overnight. Cell  
494 measurements were measured every 24 hours for 96 hours using a Tecan M1000 Plate reader.

495

496

497

498 **Immunofluorescence Microscopy**

499 For quantitative analysis of p-H2AX nuclear intensity, fibroblast cells were plated at a density of  
500 1500 cells per 25  $\mu$ L in DMEM in a 384 well plate and allowed to adhere for 3 hours. Cancer cells  
501 were stained with 5  $\mu$ M CellTrace CFSE dye (Thermofisher cat# C34554) at a concentration of  
502  $1 \times 10^6$  cells per mL in PBS for 15 minutes at 37C. Labeled cells were plated at 1500 cells per 25  
503  $\mu$ L DMEM and allowed to adhere overnight. Drugs were added from a 10x stock solution in PBS  
504 and cells were exposed for 1, 6, and 18 hours before being fixed with 4% formaldehyde for 10  
505 minutes at room temperature. Cells were washed twice in PBS, then permeabilized with 0.5% Triton  
506 X100 for 10 minutes at room temperature. Cells were washed twice with PBS; blocked in 10% goat  
507 serum (Thermofisher cat# 16210064) for one hour; stained with the p-Histone H2A.X (Ser139)  
508 antibody (Cell Signaling Technologies #9718S) in 1% goat serum in PBS overnight at 4C; stained  
509 with Alexa-647 antibody (1:250 dilution, Thermofisher A21244) in 1% goat serum in PBS for 2 hours  
510 at room temperature. Imaging was performed using an IXM-XL high throughput automated  
511 microscope. Analysis was performed using a custom CellProfiler pipeline (available upon request).

512

513 For  $\alpha$ -SMA staining, fibroblast cells were stained with 5  $\mu$ M CellTrace Far Red dye (Thermofisher  
514 cat# C34564) and cancer cells were stained with 5 $\mu$ M CellTrace Violet dye, each as described  
515 above. Each cell type was plated at a 1:1 ratio. Cell fixation, permeabilization, and staining were  
516 performed as above for H2AX. Cells were stained with the  $\alpha$ -SMA antibody (Cell Signaling  
517 Technologies #19245S) in 1% goat serum in PBS overnight at 4C.

518

519 **Mitochondrial priming assays**

520 Mitochondrial priming assays were performed according to the iBH3 protocol from Ryan et al (Ryan  
521 et al.). For monoculture conditions,  $1 \times 10^6$  cancer cells were plated in a 10cm dish and allowed to  
522 adhere overnight. For co-culture conditions, fibroblasts were stained with Cell Trace Violet plated at  
523 a 1:1 ratio with cancer cells. 24 hours post plating cells were trypsinized and arrayed in a 384 well

524 plate. A dose series of BIM peptide was added (100uM, 33uM, 10uM, 3.3uM, 1uM, 0.33uM) along  
525 with either DMSO (vehicle control) or alamethicin, a mitochondrial depolarizing agent, which was  
526 used at a final concentration of 25uM as a positive control. Plasma membrane permeabilization was  
527 achieved by the addition of digitonin at a final concentration of 20 µg/mL. Cells were incubated with  
528 BIM peptide at room temperature for 1 hour before being fixed and stained for cytochrome c  
529 retention (Fisher cat# BDB560263). Samples were analyzed on an LSRII flow cytometer.

530

### 531 **Conditioned media assays**

532 Fibroblasts were plated in a 10 cm dish at a concentration of 750,000 cells in 10mL of DMEM and  
533 allowed to adhere for 3 hours. For co-culture conditions, following fibroblast adherence, 750,000  
534 cancer cells were added to the plates. Cultures were incubated at 37C for 48 hours and conditioned  
535 media was collected and filtered through a 0.45um syringe filter. To test whether conditioned media  
536 altered drug sensitivity, cancer cell lines were plated in the respective conditioned media at a  
537 concentration of 3000 cells per 50uL conditioned media in a 384 well plate and allowed to adhere  
538 overnight. 24 hours post plating 5uL of a 10x drug stock was added to each well along with the  
539 Sytox green reagent (Fisher Scientific, S7020). Sytox Green was used at 5uM final concentration,  
540 and fluorescence was measured using a Tecan Plate reader. The Sytox Green fluorescence  
541 reading is proportional to the number of dead cells in the well. To determine numbers of live cells  
542 and the percent viability, Triton x100 was added to each well (0.2% for 3 hours at 37C) to induce  
543 permeabilization of remaining live cells.

544

### 545 **Cytokine analysis**

546 Conditioned media for the selected fibroblast lines were collected 48 hours post plating and arrayed  
547 in biological replicates with two technical replicates each. Cytokine and chemokine analysis was  
548 performed according to the manufacturer's instructions for the Cytokine/Chemokine/Growth Factor



549 45-Plex Human ProcartaPlex™ Panel 1 kit obtained from Thermofisher (cat# EPXR450-12171-  
550 901).

551

### 552 **Data analysis and statistics**

553 All statistical analyses were performed using GraphPad Prism and/or MATLAB, generally using pre-  
554 built functions (FisherTest, t test, etc.). PCA was performed using SIMCA and data were z scored  
555 (mean centered and unit variance scaled). Hierarchical clustering was performed using Spotfire  
556 using the default settings (UPGMA clustering method; Euclidean distance measure; Average value  
557 ordering weight; z-score calculation normalization method; empty value replacement: NA). Analysis  
558 of flow cytometry data was performed using FloJo.

559

### 560 **ACKNOWLEDGEMENTS**

561 We thank members of PSB and the DFCI CCSB for valuable discussions during the design  
562 and execution of this study. Additionally, we thank the UMassMed School Flow Cytometry Core and  
563 High-Throughput Imaging Core for training and advice during the execution of this study. This  
564 project was conceived by BDL and MJL. Experiments were designed by BDL, ADS, SRP, and MJL.  
565 Co-culture screen was designed and executed by BDL. All other experiments were executed by  
566 BDL, TL, RR, PCG, and GR. Analysis was conducted by BDL, TL, RR, and MJL. Manuscript was  
567 written and edited by BDL, ADS, SRP, and MJL. This work was supported by grants to MJL from  
568 the Richard and Susan Smith Family Foundation, Newton, MA, the Breast Cancer Alliance, and the  
569 American Cancer Society (RSG-17-011-01). BDL was supported by a NIH training grant  
570 (Translational Cancer Biology Training Grant, T32-CA130807). Additional support was provided by  
571 the UMass President's S&T Fund to MJL and SRP.

572

### 573 **Competing Interests**

574 None

## REFERENCES

- Al-Lazikani, B., Banerji, U., and Workman, P. (2012). Combinatorial drug therapy for cancer in the post-genomic era. *Nat Biotechnol* 1–13.
- Anders, C., and Carey, L.A. (2008). Understanding and treating triple-negative breast cancer. *Oncology (Williston Park, N.Y.)* 22, 1233–9–discussion1239–40–1243.
- Barretina, J., Caponigro, G., Stransky, N., Venkatesan, K., Margolin, A.A., Kim, S., Wilson, C.J., Lehár, J., Kryukov, G.V., Sonkin, D., et al. (2012). The Cancer Cell Line Encyclopedia enables predictive modelling of anticancer drug sensitivity. *Nature* 483, 603–607.
- Cancer Genome Atlas Network (2012). Comprehensive molecular characterization of human colon and rectal cancer. *Nature* 487, 330–337.
- Cancer Genome Atlas Network, Getz, G., Saksena, G., Park, P.J., Chin, L., and Mills, G.B. (2012). Comprehensive molecular portraits of human breast tumours. *Nature* 490, 61–70.
- Carey, L.A., Dees, E.C., Sawyer, L., Gatti, L., Moore, D.T., Collichio, F., Ollila, D.W., Sartor, C.I., Graham, M.L., and Perou, C.M. (2007). The Triple Negative Paradox: Primary Tumor Chemosensitivity of Breast Cancer Subtypes. *Clinical Cancer Research* 13, 2329–2334.
- Chonghaile, T.N., Sarosiek, K.A., Vo, T.T., Ryan, J.A., Tammareddi, A., Moore, V.D.G., Deng, J., Anderson, K.C., Richardson, P., Tai, Y.T., et al. (2011). Pretreatment Mitochondrial Priming Correlates with Clinical Response to Cytotoxic Chemotherapy. *Science* 334, 1129–1133.
- Cohen, A.L., Soldi, R., Zhang, H., Gustafson, A.M., Wilcox, R., Welm, B.E., Chang, J.T., Johnson, E., Spira, A., Jeffrey, S.S., et al. (2011). A pharmacogenomic method for individualized prediction of drug sensitivity. *Mol Syst Biol* 7, 1–13.
- Fry, R.C., Svensson, J.P., Valiathan, C., Wang, E., Hogan, B.J., Bhattacharya, S., Bugni, J.M., Whittaker, C.A., and Samson, L.D. (2008). Genomic predictors of interindividual differences in response to DNA damaging agents. *Genes & Development* 22, 2621–2626.
- García-González, A.P., Ritter, A.D., Shrestha, S., Andersen, E.C., Yilmaz, L.S., and Walhout, A.J.M. (2017). Bacterial Metabolism Affects the *C. elegans* Response to Cancer Chemotherapeutics. *Cell* 169, 431–441.e438.
- Gilbert, L.A., and Hemann, M.T. (2010). DNA Damage-Mediated Induction of a Chemoresistant Niche. *Cell* 143, 355–366.
- Heiser, L.M., Wang, N.J., Talcott, C.L., Laderoute, K.R., Knapp, M., Guan, Y., Hu, Z., Ziyad, S., Weber, B.L., Laquerre, S., et al. (2009). Integrated analysis of breast cancer cell lines reveals unique signaling pathways. *Genome Biol* 10, R31.
- Innocenti, F., Cox, N.J., and Dolan, M.E. (2011). The use of genomic information to optimize cancer chemotherapy. *Semin. Oncol.* 38, 186–195.
- Janes, K.A., and Yaffe, M.B. (2006). Data-driven modelling of signal-transduction networks. *Nat Rev Mol Cell Biol* 7, 820–828.

- Jiang, T., Shi, W., Wali, V.B., Pongor, L.S., Li, C., Lau, R., Gyórfy, B., Lifton, R.P., Symmans, W.F., Pusztai, L., et al. (2016). Predictors of Chemosensitivity in Triple Negative Breast Cancer: An Integrated Genomic Analysis. *Plos Med* 13, e1002193.
- Kalluri, R., and Zeisberg, M. (2006). Fibroblasts in cancer. *Nat Rev Cancer* 6, 392–401.
- Lamb, J., Crawford, E.D., Peck, D., Modell, J.W., Blat, I.C., Wrobel, M.J., Lerner, J., Brunet, J.-P., Subramanian, A., Ross, K.N., et al. (2006). The Connectivity Map: using gene-expression signatures to connect small molecules, genes, and disease. *Science* 313, 1929–1935.
- Lamprecht, M., Sabatini, D., and Carpenter, A. (2007). CellProfiler™: free, versatile software for automated biological image analysis. *Biotech.* 42, 71–75.
- Lee, M.J., Ye, A.S., Gardino, A.K., Heijink, A.M., Sorger, P.K., Macbeath, G., and Yaffe, M.B. (2012). Sequential application of anticancer drugs enhances cell death by rewiring apoptotic signaling networks. *Cell* 149, 780–794.
- Lehmann, B.D., Bauer, J.A., Chen, X., Sanders, M.E., Chakravarthy, A.B., Shyr, Y., and Pietenpol, J.A. (2011). Identification of human triple-negative breast cancer subtypes and preclinical models for selection of targeted therapies. *J Clin Invest* 1–18.
- Li, J., Zhao, W., Akbani, R., Liu, W., Ju, Z., Ling, S., Vellano, C.P., Roebuck, P., Yu, Q., Eterovic, A.K., et al. (2017). Characterization of Human Cancer Cell Lines by Reverse-phase Protein Arrays. *Cancer Cell* 31, 225–239.
- Mcmillin, D.W., Delmore, J., Weisberg, E., Negri, J.M., Geer, D.C., Klippel, S., Mitsiades, N., Schlossman, R.L., Munshi, N.C., Kung, A.L., et al. (2010). Tumor cell-specific bioluminescence platform to identify stroma-induced changes to anticancer drug activity. *Nat Med* 16, 483–489.
- Montero, J., Sarosiek, K.A., DeAngelo, J.D., Maertens, O., Ryan, J., Ercan, D., Piao, H., Horowitz, N.S., Berkowitz, R.S., Matulonis, U., et al. (2015). Drug-induced death signaling strategy rapidly predicts cancer response to chemotherapy. *Cell* 160, 977–989.
- Nguyen, T.V., Sleiman, M., Moriarty, T., Herrick, W.G., and Peyton, S.R. (2014). Sorafenib resistance and JNK signaling in carcinoma during extracellular matrix stiffening. *Biomaterials* 35, 5749–5759.
- Pallasch, C.P., Leskov, I., Braun, C.J., Vorholt, D., Drake, A., Soto-Feliciano, Y.M., Bent, E.H., Schwamb, J., Iliopoulou, B., Kutsch, N., et al. (2014). Sensitizing Protective Tumor Microenvironments to Antibody-Mediated Therapy. *Cell* 156, 590–602.
- Perou, C.M., Sørlie, T., Eisen, M.B., van de Rijn, M., Jeffrey, S.S., Rees, C.A., Pollack, J.R., Ross, D.T., Johnsen, H., Akslen, L.A., et al. (2000). Molecular portraits of human breast tumours. *Nature* 406, 747–752.
- Prat, A., Parker, J.S., Karginova, O., Fan, C., Livasy, C., Herschkowitz, J.I., He, X., and Perou, C.M. (2010). Phenotypic and molecular characterization of the claudin-low intrinsic subtype of breast cancer. *Breast Cancer Res* 12, R68–18.
- Ryan, J., and Letai, A. (2013). BH3 profiling in whole cells by fluorimeter or FACS. *Methods* 61, 156–164.

Ryan, J., Montero, J., Rocco, J., and Letai, A. iBH3: simple, fixable BH3 profiling to determine apoptotic priming in primary tissue by flow cytometry. *Biological Chemistry* 397, 14.

Shah, S.P., Roth, A., Goya, R., Oloumi, A., Ha, G., Zhao, Y., Turashvili, G., Ding, J., Tse, K., Haffari, G., et al. (2012). The clonal and mutational evolution spectrum of primary triple-negative breast cancers. *Nature* 1–5.

Straussman, R., Morikawa, T., Shee, K., Barzily-Rokni, M., Qian, Z.R., Du, J., Davis, A., Mongare, M.M., Gould, J., Frederick, D.T., et al. (2012). Tumour micro-environment elicits innate resistance to RAF inhibitors through HGF secretion. *Nature* 487, 500–504.

Weaver, V.M., Lelièvre, S., Lakins, J.N., Chrenek, M.A., Jones, J.C.R., Giancotti, F., Werb, Z., and Bissell, M.J. (2002). beta4 integrin-dependent formation of polarized three-dimensional architecture confers resistance to apoptosis in normal and malignant mammary epithelium. *Cancer Cell* 2, 205–216.

Yard, B.D., Adams, D.J., Chie, E.K., Tamayo, P., Battaglia, J.S., Gopal, P., Rogacki, K., Pearson, B.E., Phillips, J., Raymond, D.P., et al. (2016). A genetic basis for the variation in the vulnerability of cancer to DNA damage. *Nature Communications* 7, 11428.

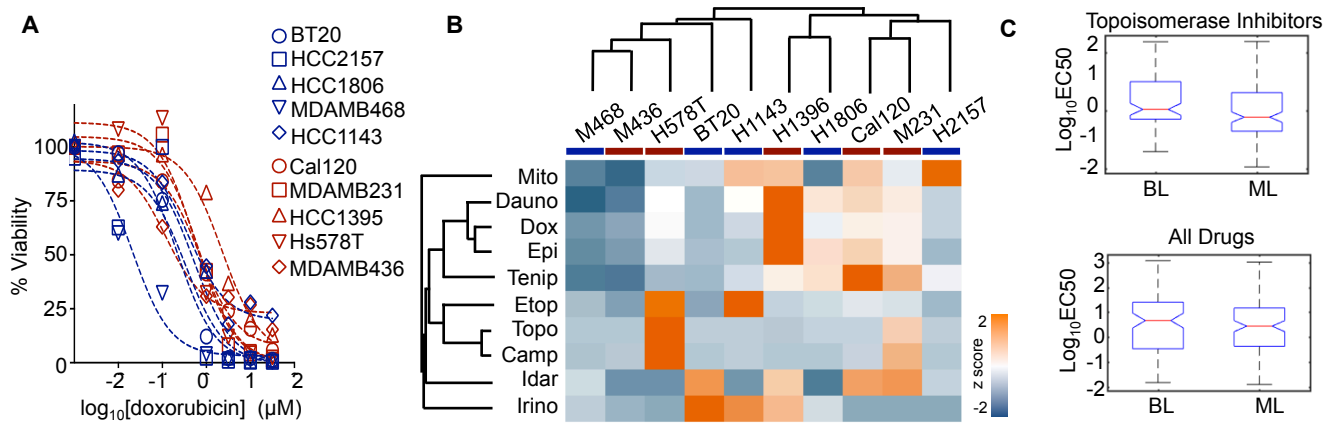

**Figure 1: TNBC cell sensitivity to topoisomerase inhibition is not well predicted by basal-like versus mesenchymal-like gene expression status (A)** Panel of 10 TNBC cell lines from the Basal-like (BL, blue) or Mesenchymal-like (ML, red) gene expression subclasses. Relative viability following 72 hour exposure to doxorubicin quantified using CellTiter-Glo. Data are from biological duplicates. **(B)** Cell viability measured as in (A) for 10 common Topo I or II inhibitors. Data are z scored EC50 per drug. Dendograms from hierarchical clustering shown for drugs and for cells (BL cells highlighted with blue bar; ML cells highlighted with red bar). **(C)** Sensitivity to topoisomerase inhibitors (top) or all drugs (bottom) in publically available LINCS data. Data are representative of 27 TNBC cell lines and 67 total drugs.

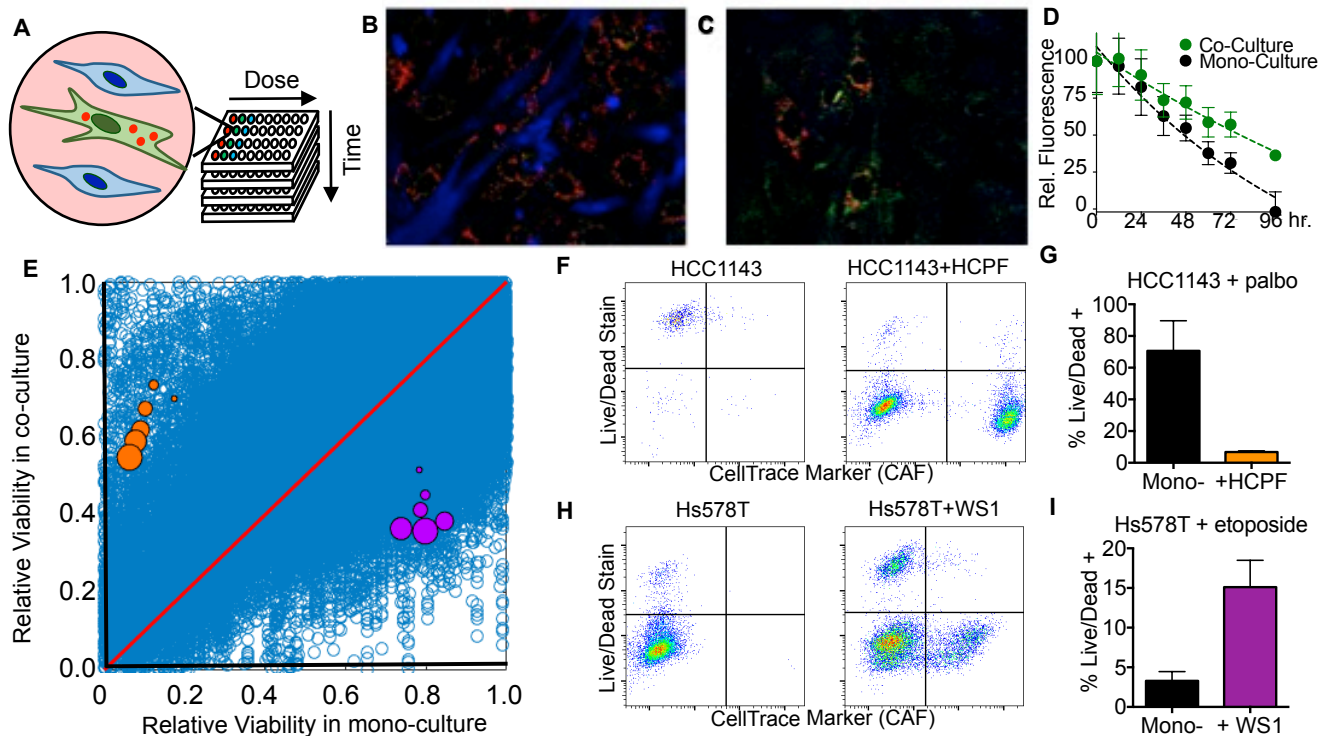

**Figure 2: Co-culture screen to identify tumor-stroma interactions that modulate drug induced cell death.** (A) Schematic of screen design. TNBC cell lines were labeled with JC-1, grown in mono-culture or in co-culture with primary fibroblast cells, and treated with one of 42 anti-cancer drugs. JC-1 fluorescence was monitored using a fluorescence plate reader at 8 hour intervals for 72 hours. (B and C) Representative images of BT20 cells co-cultured with HADF fibroblasts. BT20 cells labeled with JC-1 dye; HADF labeled with a blue cell dye (CellTrace). Images taken before drug addition (B) or 96 hours after exposure to 0.5  $\mu$ M camptothecin (C). (D) Kinetic trace of JC-1 red fluorescence following exposure to camptothecin as in panel B-C. Data are relative JC-1 red fluorescence, compared to well average prior to drug addition. (E) Total co-culture screen data. 312,120 total measurements of drug response. Orange dots represent HCC1143 cells co-cultured with HCPF and treated with palbociclib. Purple dots represent Hs578T co-cultured with WS1 and exposed to etoposide. For colored dots, increasing size represents longer drug exposure times. (F-I) Validation of co-culture screening data. Error bars represent mean  $\pm$  standard deviation for five (panel D) and three (G,I) biological replicates.

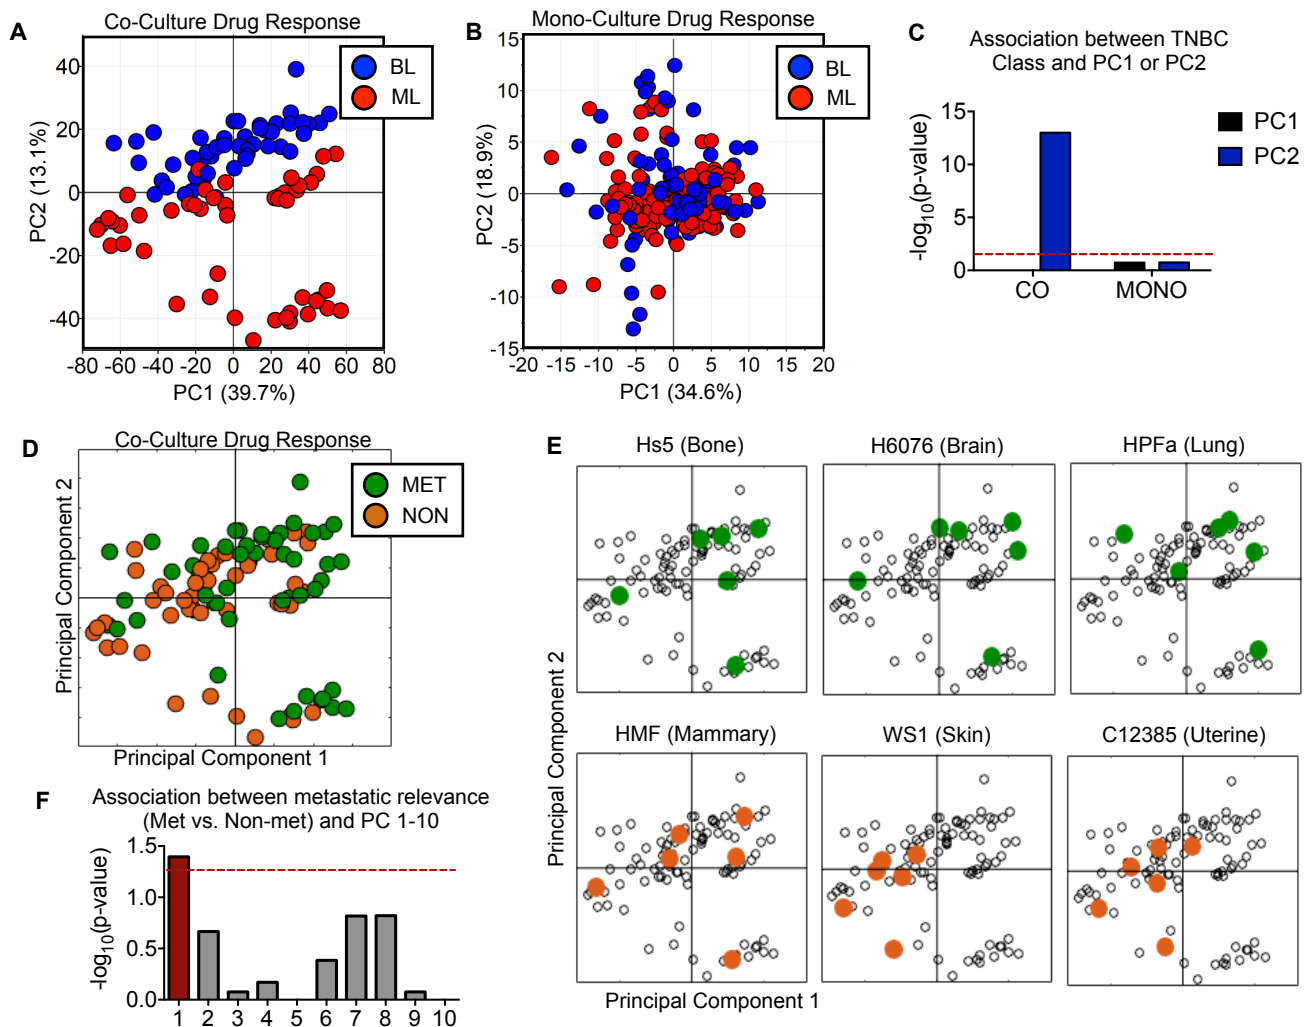

**Figure 3: Drug responses from TNBCs treated in co-culture, but not mono-culture, accurately distinguish cells Basal-Like and Mesenchymal-Like TNBC subclasses. (A)** PCA on co-culture drug response. **(B)** PCA on mono-culture drug response. **(C)** Association between identified principal components and Basal A subclass. p-value calculated using Fisher's Exact test. Red line marks 0.05 cut-off. **(D)** PCA scores projection, as in panel A. **(E)** Scores for six fibroblast cell lines highlighted. Total data are shown in Supplemental Figure 8. Common metastatic locations are highlighted in green, and uncommon sites are orange. **(F)** Positive scores on PC1 are associated with common metastatic sites and negative scores on PC1 are associated with uncommon sites ( $p = 0.040$ ). P-values generated using Fisher's Exact Test.

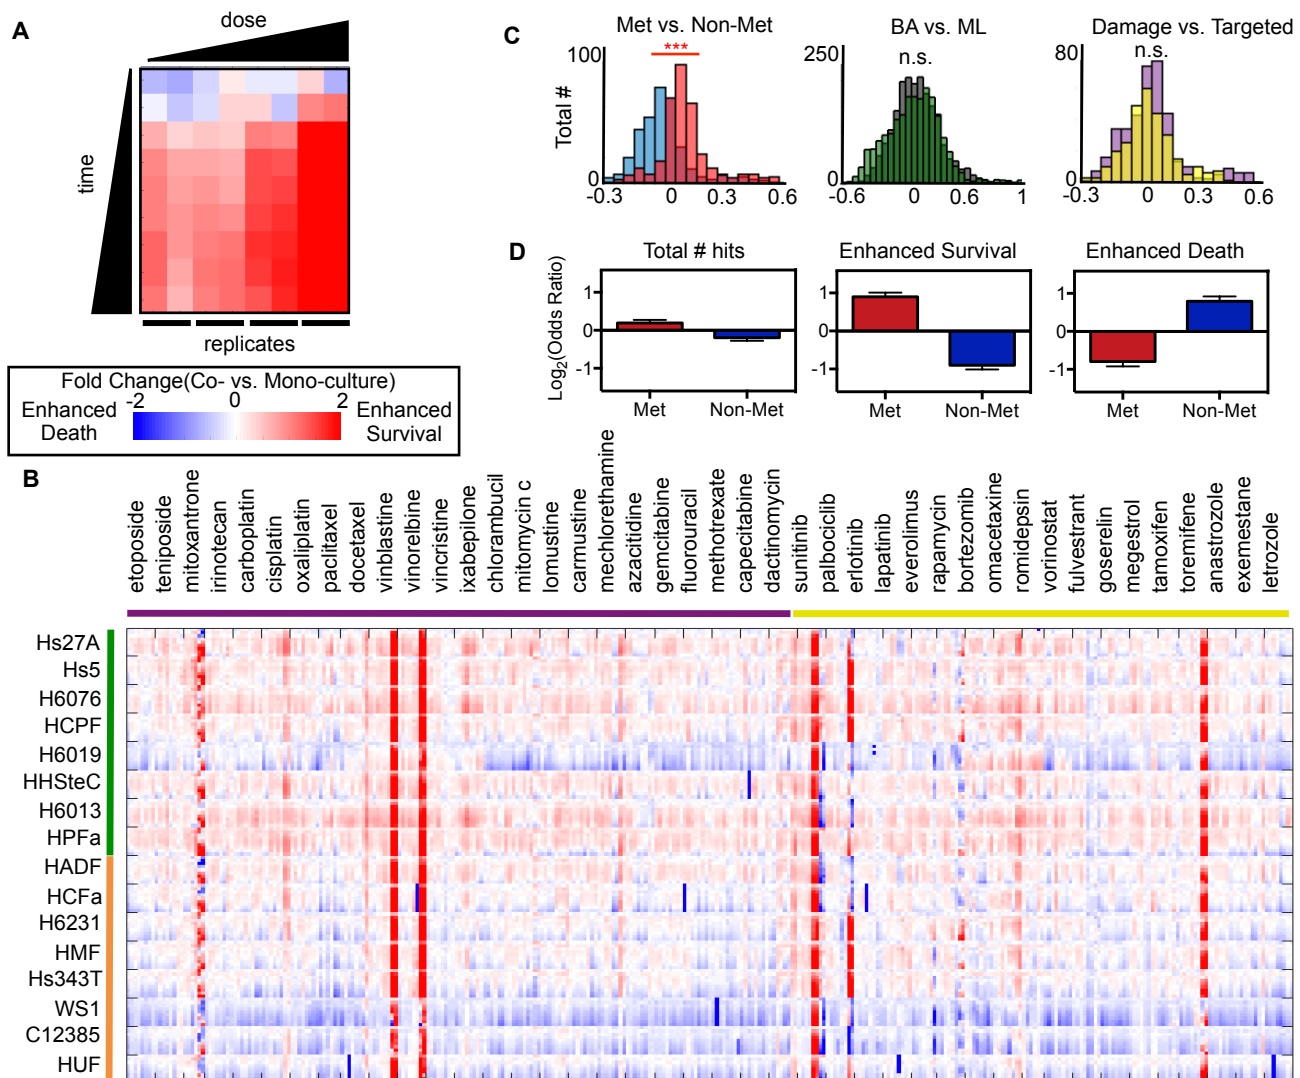

**Figure 4: Divergent interactions between TNBCs and fibroblasts from common vs. uncommon metastatic locations (A and B)** Ratio of co-culture vs. mono-culture drug response. 72 data points for each unique cancer-fibroblast-drug interaction arrayed by dose and time (9 time points and 4 doses in duplicate). **(A)** Example of total data for BT20-Hs27a-cisplatin. **(B)** Average across all cell lines. See Supplemental Figure 9 for additional cell line specific data. Top 8 fibroblasts (green bar, left) are from common metastatic organs; bottom 8 fibroblasts (orange bar, left) are from uncommon metastatic sites. 24 left-most drugs (purple bar, top) are cytotoxic chemotherapies; 18 right-most drugs (yellow bar, top) are targeted therapies. **(C)** Distributions of fibroblast influence for metastatic vs. non-metastatic locations (Met vs. Non-met), Basal-like versus Mesenchymal-Like (BL vs. ML), and cytotoxic versus targeted therapies (Damage vs. Targeted). Data are the mean co-culture:mono-culture survival ratio for each unique cancer-fibroblast-drug interaction. \*\*\*  $p < 0.001$ ; n.s. = not significant. **(D)** Degree of enrichment for fibroblasts from Met vs. Non-met locations within 5039 significantly altered drug responses (“Total # Hits”; See Supplemental Figure 4D), or from the subset of these that increased survival or increased death. Data shown are Odds Ratios from Fisher’s Exact Tests.



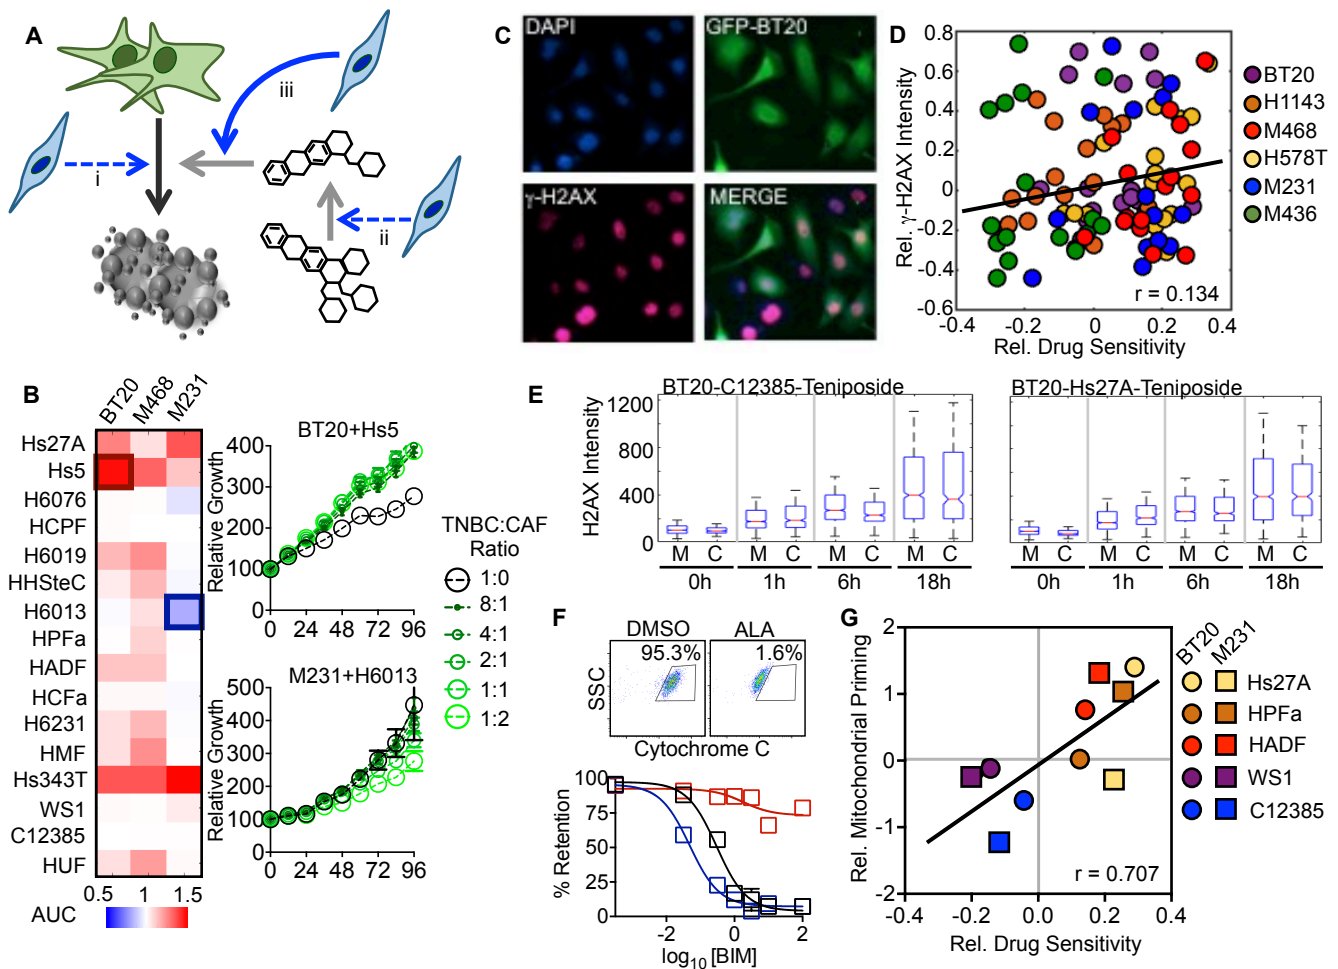

**Figure 5: Fibroblasts alter drug sensitivity through modulation of mitochondrial apoptotic priming.** (A) Schematic of possible mechanisms by which stromal cells alter drug sensitivity. (B) TNBC cells labeled with GFP were grown in mono-culture or in co-culture with listed fibroblasts. Growth rate quantified using well fluorescence. Heatmap data are area under curve (AUC) from biological triplicate measurements. Cells plated at 1:1 ratio. Growth curves shown for the most enhanced and suppressed growth rate. (C-E)  $\gamma$ H2AX (p-H2AX, S139) monitored by immunofluorescence microscopy. (C) Representative image of GFP-BT20 cells co-cultured with HADF. (D) Quantification of TNBC nuclear  $\gamma$ H2AX, using automated image analysis (CellProfiler). Scatterplot of co-culture:mono-culture viability ratio (from screen in Fig. 2E) compared to co-culture:mono-culture H2AX intensity ratio. Both plotted in Log2 scale. Average number of nuclei per counted per condition is 758 (range 93 – 1632) (E) Boxplots showing distribution of nuclear  $\gamma$ H2AX intensities over time for BT20 cells in mono-culture (M) or in co-culture (C) with strongly drug sensitizing fibroblasts (C12385) and de-sensitizing fibroblasts (Hs27A). (F) Mitochondrial priming assay. (top) Cytochrome C retention quantified using the iBH3 profiling assay. Alamethicin (ALA) used as a positive control for mitochondrial rupture. (bottom) Mitochondrial priming quantified using exposure to varied concentrations of BIM. (G) Scatterplot comparing relative drug sensitivity (as in panel E) compared to degree of co-culture induced change in mitochondrial priming. Priming status quantified as AUC from BIM dose response. Data are from biological quadruplicates.

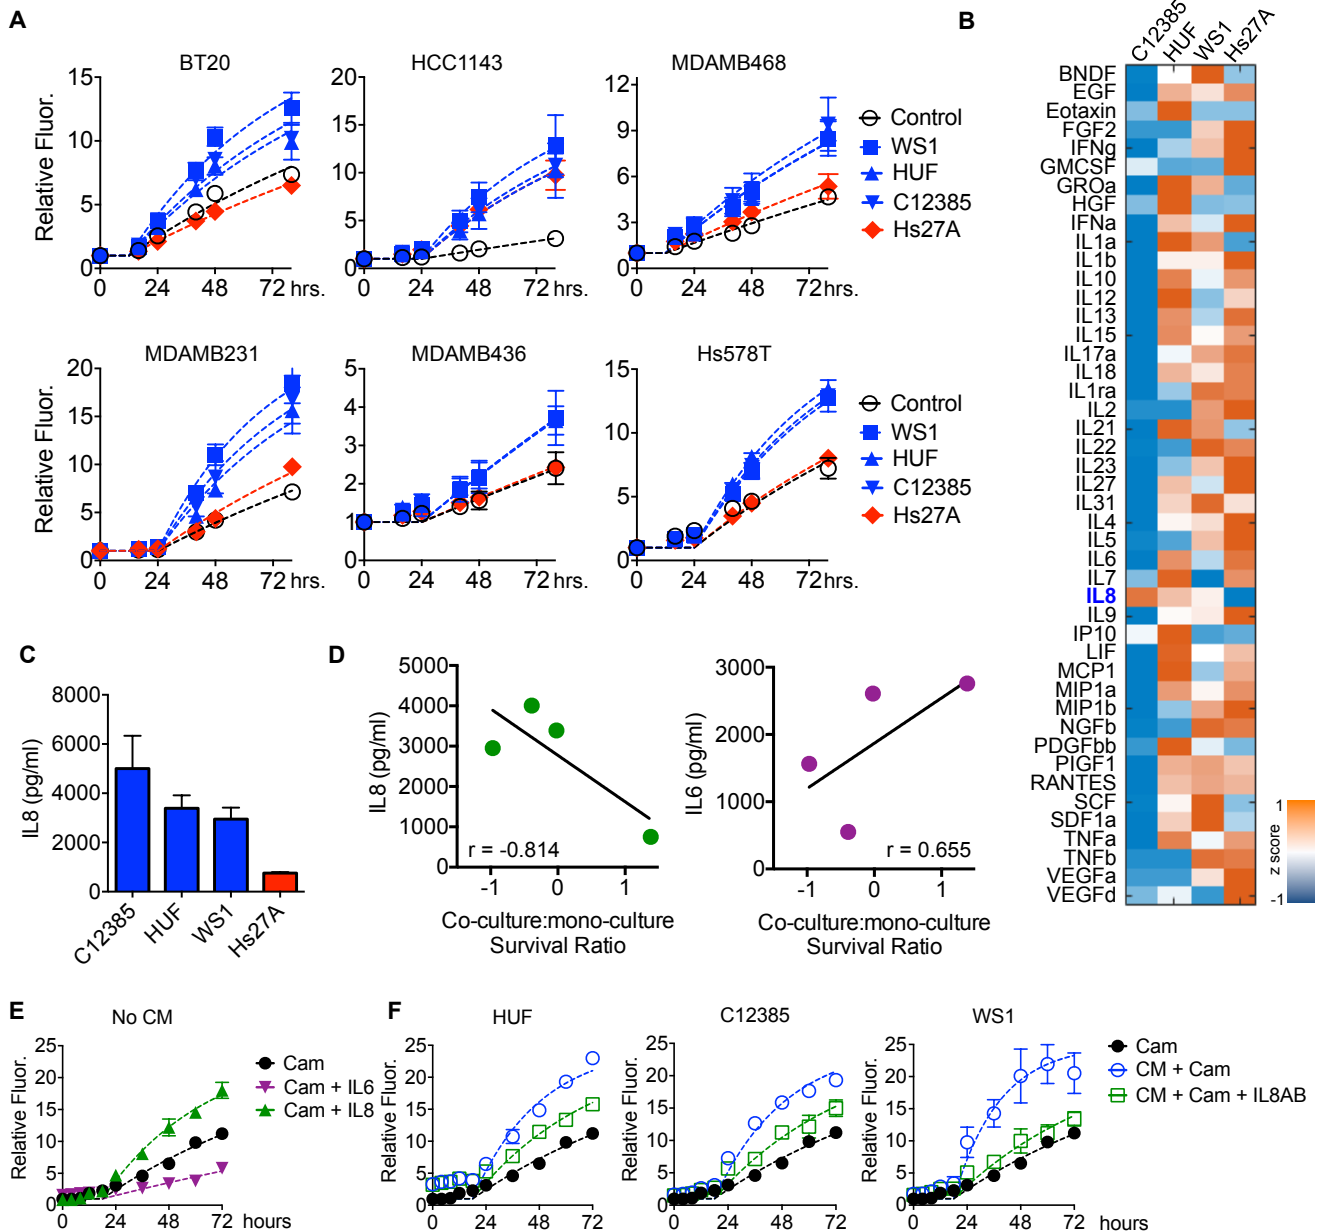

**Figure 6: IL-8 secretion from fibroblast cells enhances sensitivity to DNA damage. (A)** Cell death measured using Sytox green following exposure to 10  $\mu$ M teniposide, in the presence or absence of fibroblast conditioned media (CM). **(B and C)** Cytokine and growth factor secretion quantified using Luminex assay. Heatmap in panel B is colored according to the relative secretion across four CM samples. Data are from biological duplicate samples. **(D)** Secretion of IL8 and IL6 are shown relative to the Log<sub>2</sub> survival ratio (data are from co-culture drug screen as in Figure 2E). **(E and F)** Cell death measured using Sytox green following exposure to 5  $\mu$ M camptothecin (Cam), in the presence or absence of recombinant IL6 or IL8 (E), or conditioned media (CM) and/or IL8 neutralizing antibody (IL8AB). IL6 and IL8 were used at 50 ng/ $\mu$ L, and IL8AB was used at 100  $\mu$ g/mL.

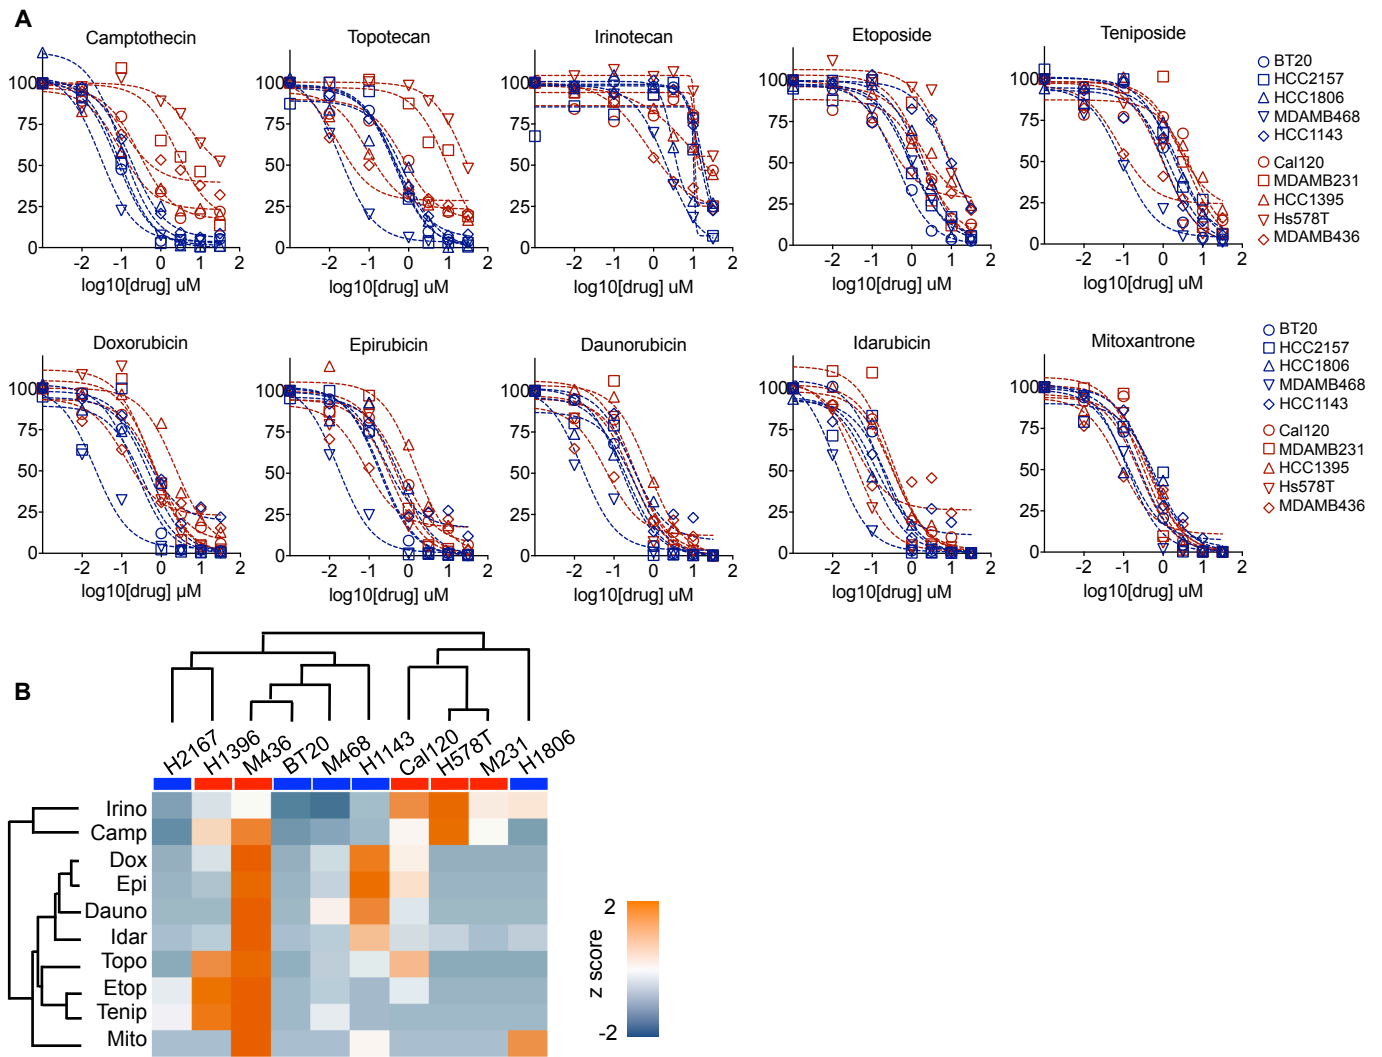

**Supplementary Figure 1: Variable sensitivity to common DNA damaging agents in TNBC cells. (A)** Drug dose response curves for 10 Topo I and Topo II inhibitors. Data are presented as in Figure 1A. **(B)** Cell viability measured as in (A) for 10 Topo I/II inhibitors. Data are z scored max death at 72 hours (Emax). Dendograms from hierarchical clustering shown for drugs and for cells (Basal A cells highlighted with blue bar; Claudin-low cells highlighted with red bar).

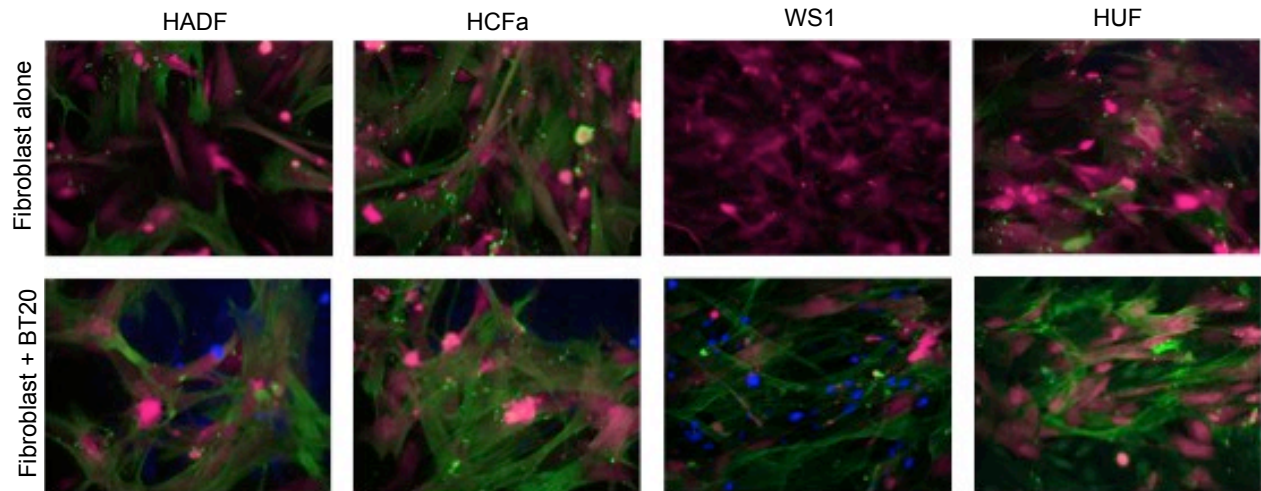

**Supplemental Figure 2: Primary fibroblasts stain positive for markers of activation in co-culture with TNBC cells.** Primary fibroblasts grown in mono-culture or in co-culture with BT20 cells were stained for expression of  $\alpha$ -smooth muscle actin (SMA), a marker for activated fibroblasts (a.k.a. “Cancer Associated Fibroblasts”, CAFs, or myofibroblasts). SMA in green. FarRed dye (CellTrace) used to stain fibroblasts and Blue dye (CellTrace) used to stain BT20. BT20 cells grown in mono-culture did not stain positive for SMA expression (data not shown).

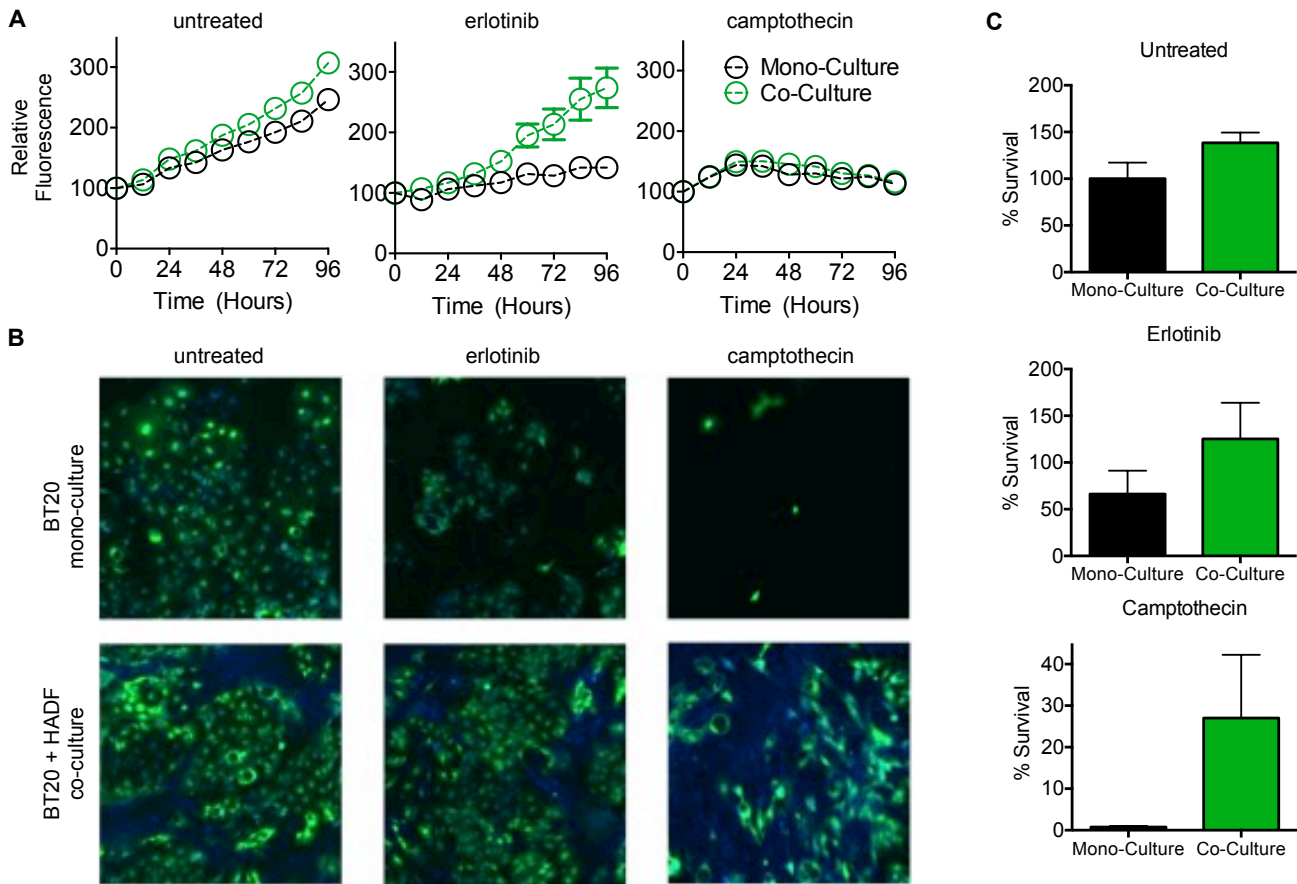

**Supplemental Figure 3: GFP-based measurements do not accurately report cell death. (A)** Quantification of cell number using GFP fluorescence measured via fluorescence plate reader. Data are from biological quadruplicate experiments. Mono-culture is BT20 cells labeled with GFP; co-culture is GFP-BT20 + HADF, seeded at a 1:1 ratio. Data are GFP fluorescence per well in untreated cells, or following exposure to 10  $\mu$ M erlotinib or 500 nM camptothecin. **(B)** Representative images from experiment in panel (A). Images collected using fluorescence microscopy following the 96 hour measurement on a plate reader. GFP-BT20 are green; HADF are stained blue using a whole cell stain. **(C)** Cell viability based on quantitative image analysis. Wells from experiment in panel (A) were imaged at 96 hours and cell numbers were quantified using CellProfiler. % Survival is relative to untreated cells grown in mono-culture. At least 300 cells were counted in every image, except BT20 mono-cultures treated with camptothecin, where the average number of cells per image was 20 (8 images collected). Well-based fluorescence measurements taken using a plate reader accurately capture proliferation phenotypes but fail to capture differences in cell death.

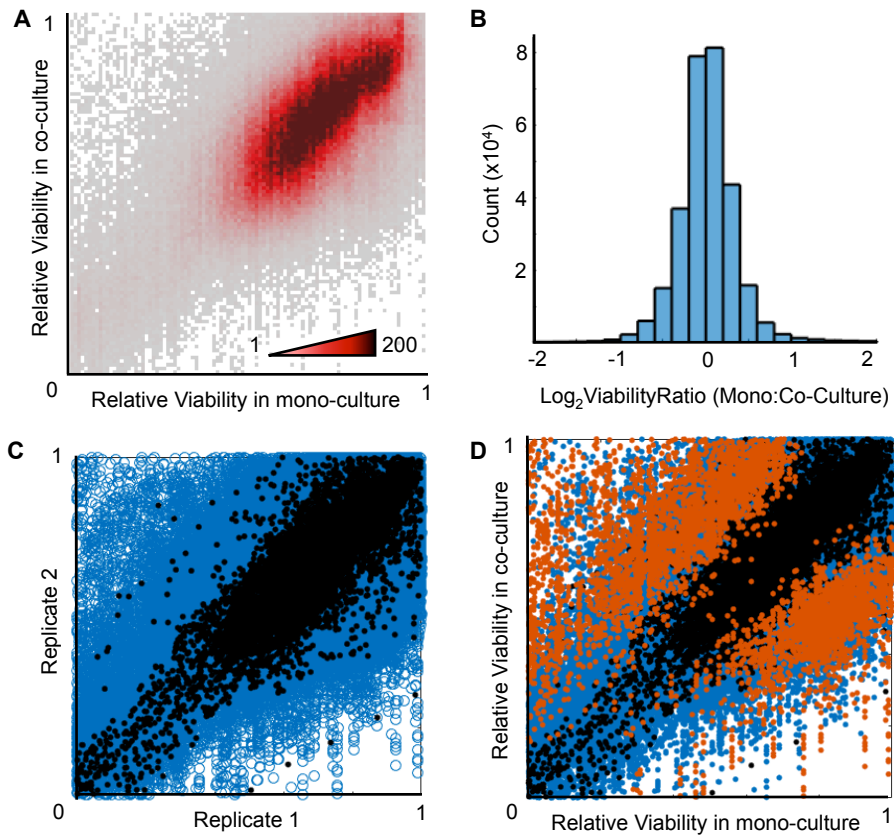

**Supplemental Figure 4: Statistical analysis of co-culture screen to identify CAF-cancer interactions that significantly alter drug sensitivity.** (A) Density plot of co-culture screen data. 95% of 312,120 data points fall within a single dense cluster (20-50% death; no influence of CAF). (B) Ratio of drug response in mono-culture vs. co-culture with CAFs. Data are normally distributed. (C) Correlation among replicates ( $r^2 = 0.7315$ ). Two biological replicates of mono-culture drug response are shown in black (total dataset in blue, shown as reference). (D) CAF-cancer interactions that significantly alter drug response shown in orange (z score of mono:co-culture ratio  $> 3$ ). 5039 drug responses were significantly altered relative to error among control replicates (black). See also Table XX.

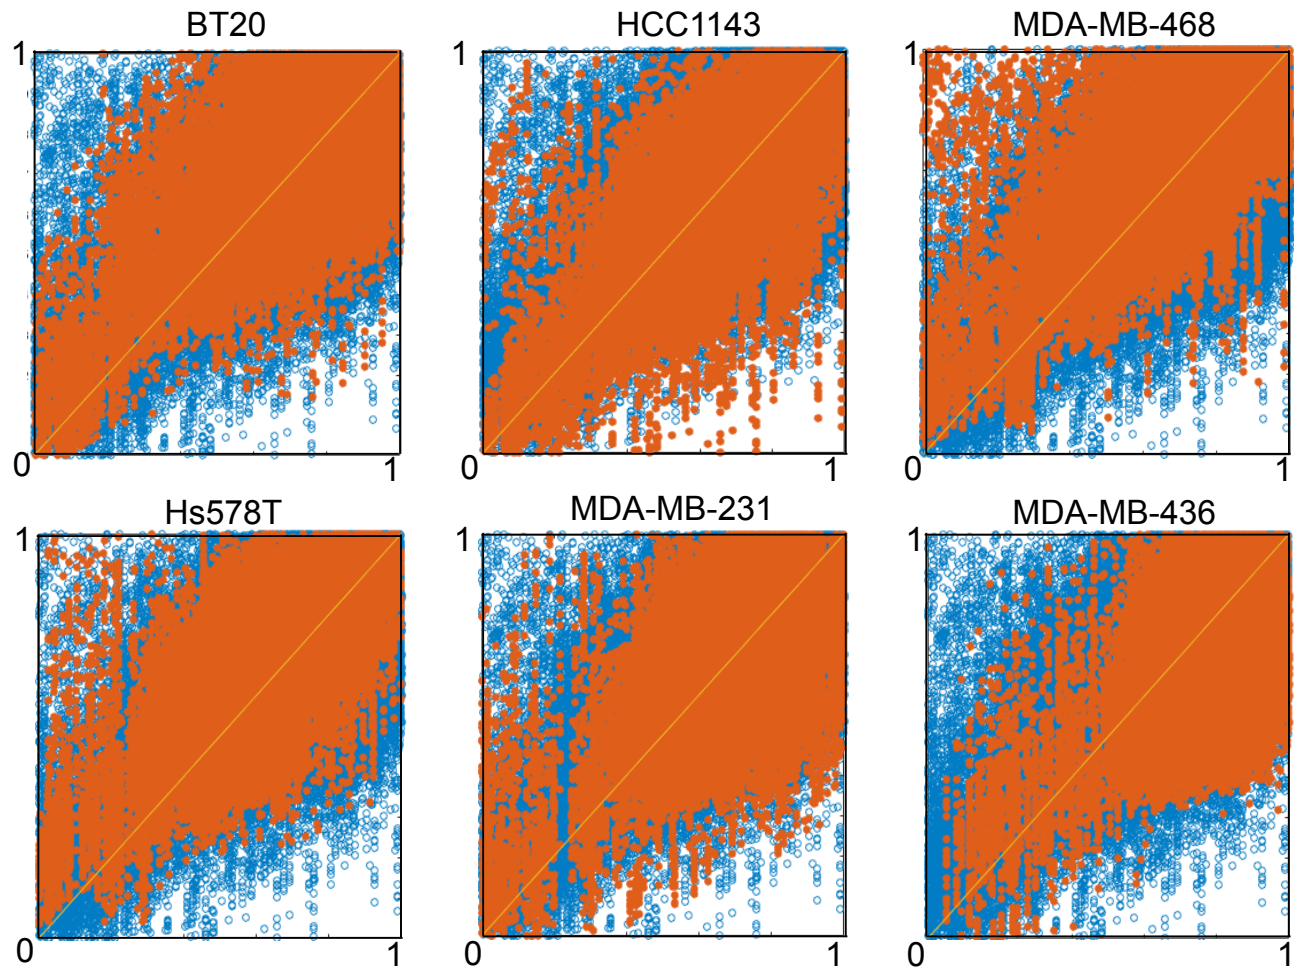

**Supplemental Figure 5: CAFs influence drug sensitivity across TNBC cell lines.** Data plotted as in Figure 2E, with drug responses of TNBC cells grown in mono-culture on the x-axis, and responses in co-culture with CAFs on the y-axis. In each plot, the overall dataset is shown in blue circles and the data for each TNBC cell line is shown in orange.

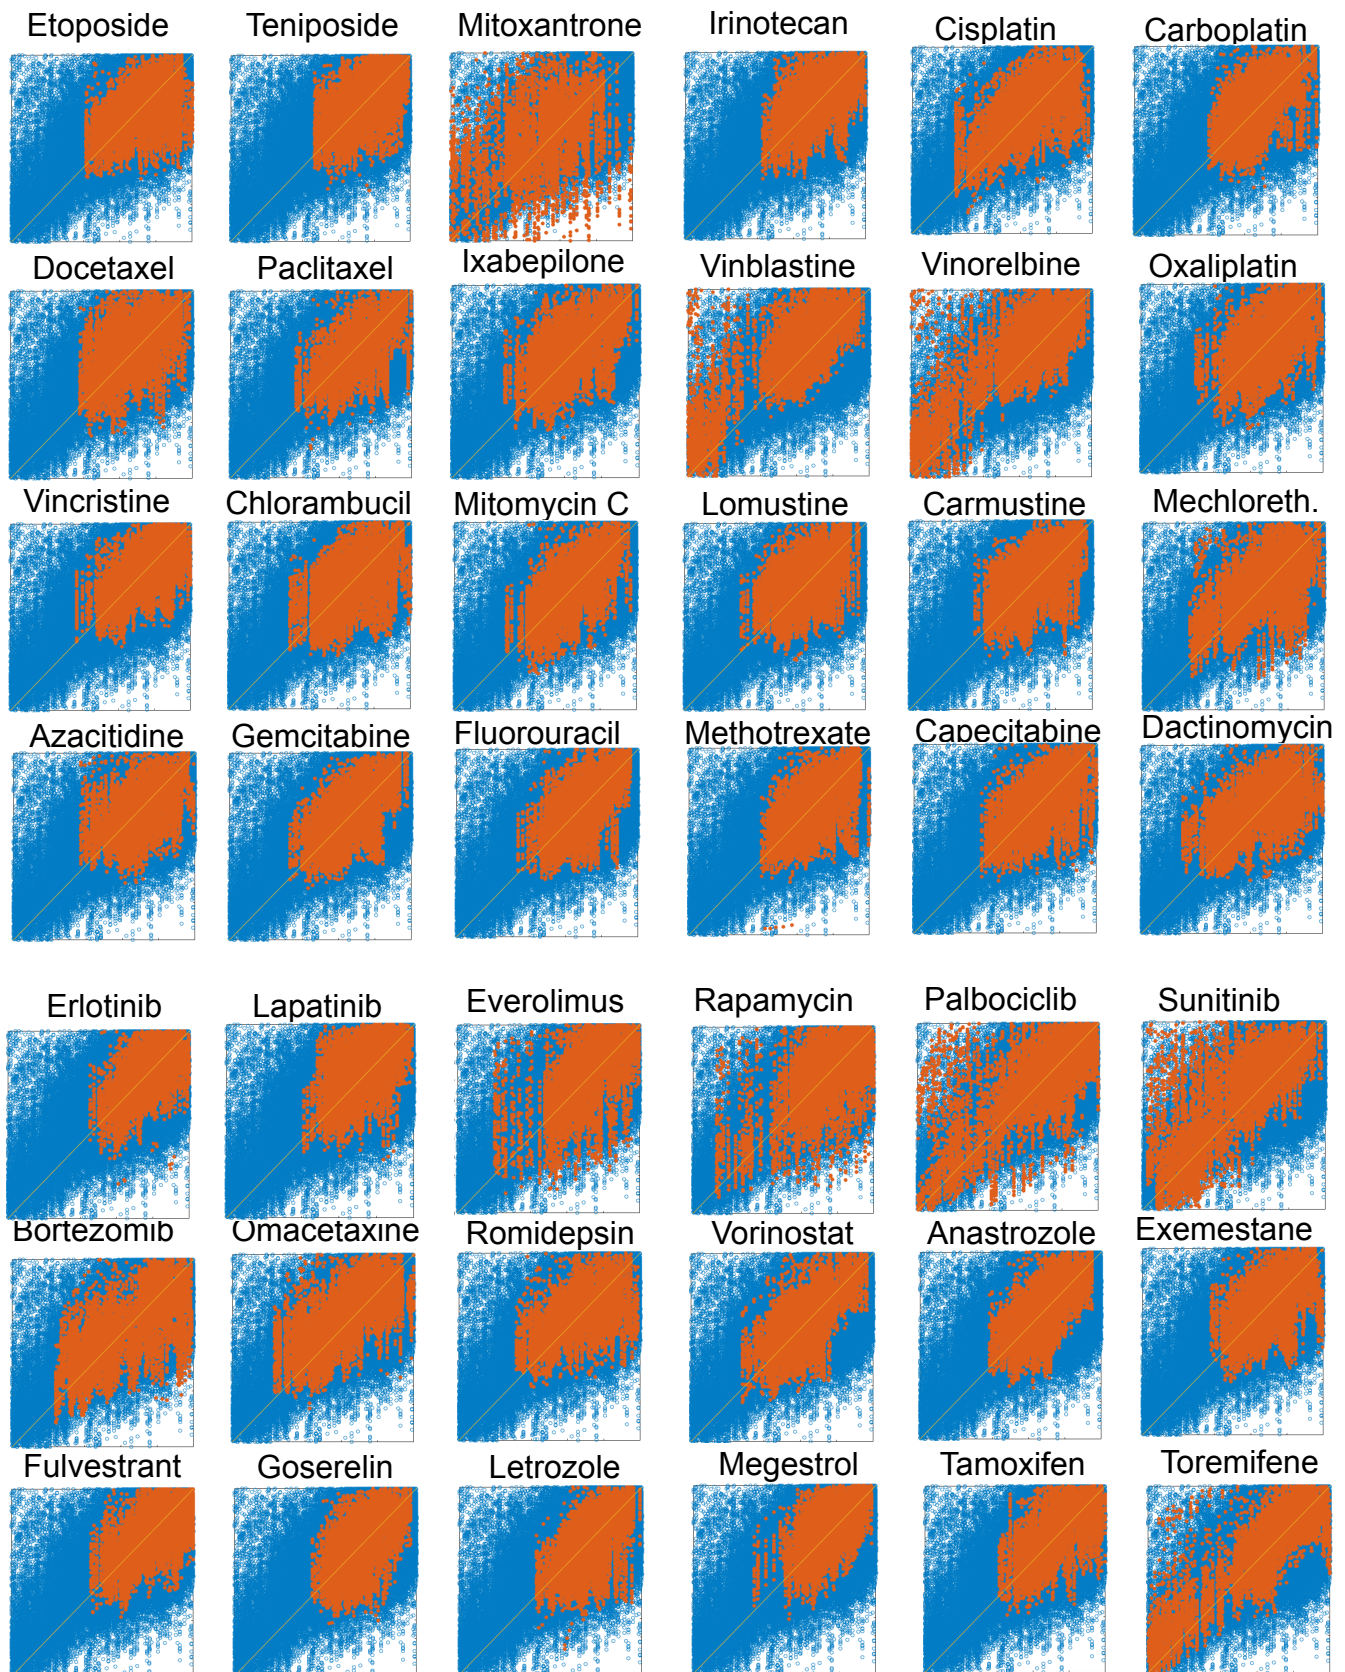

**Supplemental Figure 6: Nearly all classes of drugs are altered by TNBC-CAF interactions.** Data plotted as in Figure 2E. Drugs organized by class, with cytotoxic/DNA damaging agents on top (first 4 rows) and targeted therapies below (bottom 3 rows). Data for each drug are highlighted in orange.



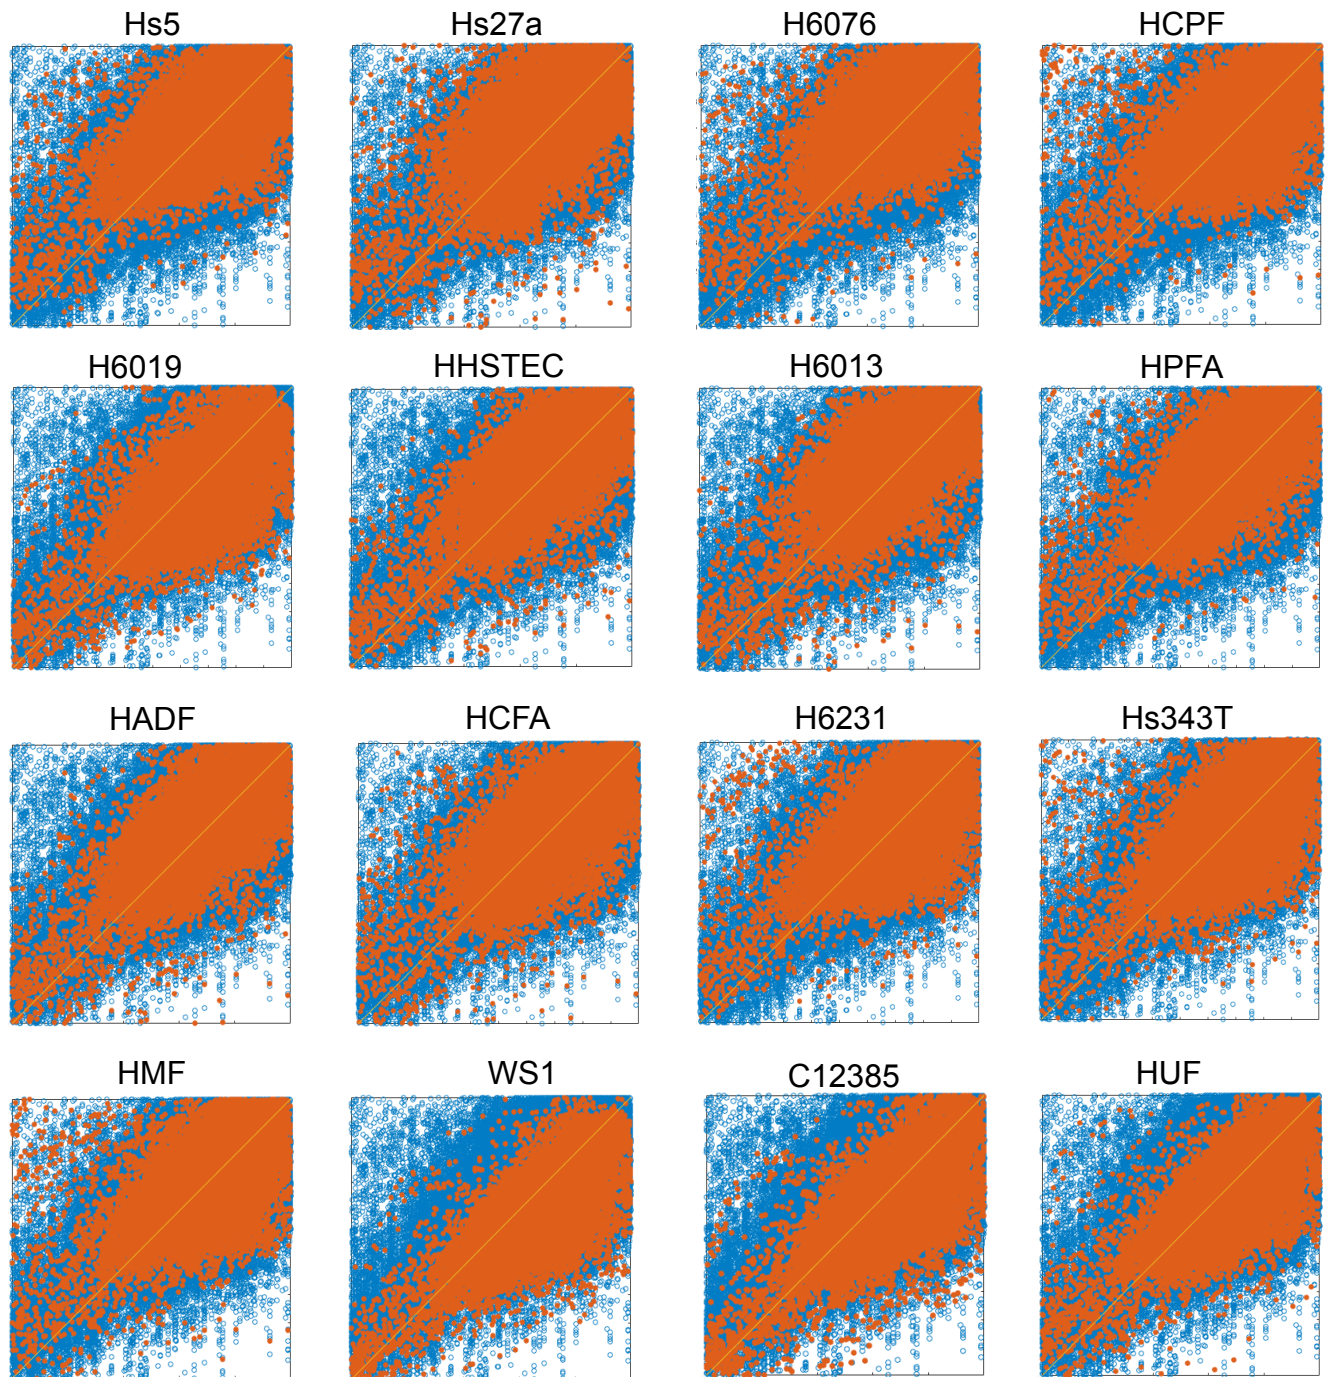

**Supplemental Figure 7: Fibroblasts specific modulation of drug responses in TNBC cells.** Data plotted as in Figure 2E. In each plot, the overall dataset is shown in blue circles and the data for each fibroblast cell line are shown in orange. Top 2 rows (8 fibroblast lines) are derived from common metastatic locations; bottom 2 rows are from locations that do not typically harbor breast cancer metastasis.

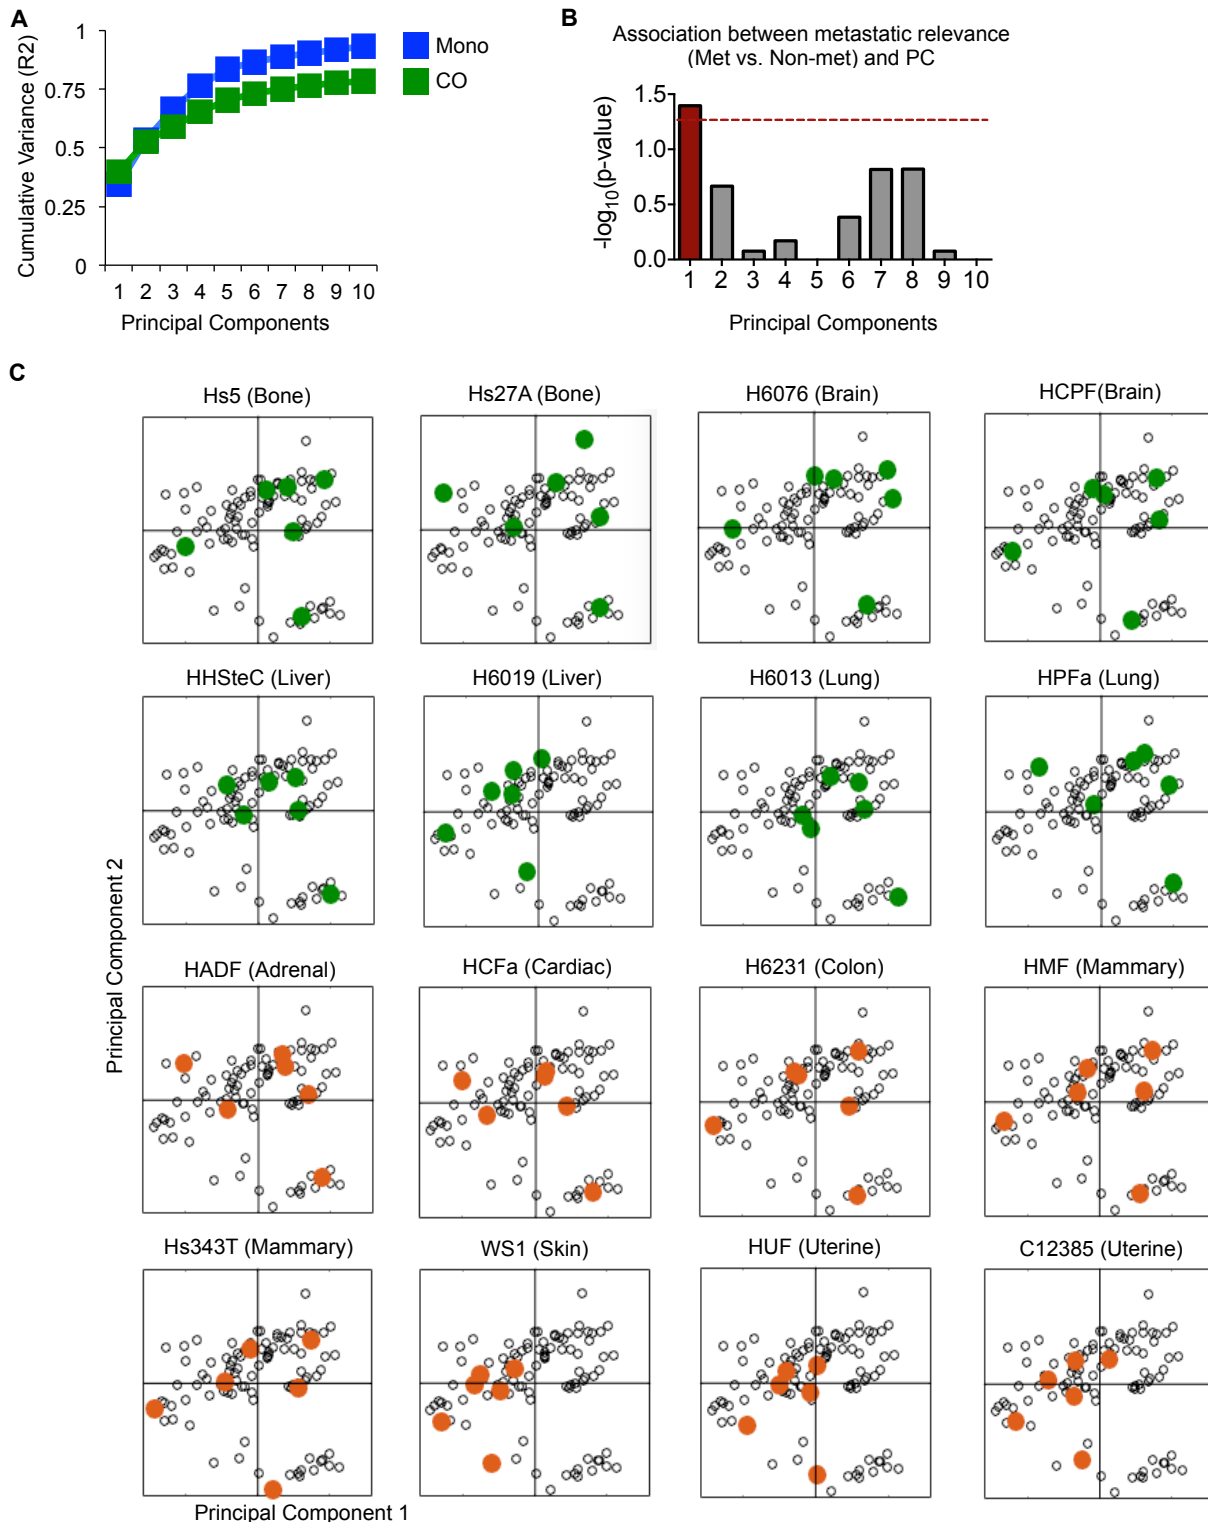

**Supplemental Figure 8: PCA of TNBC drug responses in co-culture reveals divergent roles for CAFs derived from different anatomical locations.** (A) Cumulative variance (sum of eigenvectors) captured by PCA of mono-culture and co-culture drug responses. (B) Statistical association between metastatic class of CAF (common metastatic location or non-common metastatic location) and each principal component. p-values calculated using Fisher's Exact test. PC1 captures variation associated with met vs. non-met dichotomy. (C) PCA scores projection, as in Figure 3A, with scores for each class of CAF highlighted. Common metastatic locations are highlighted in green, and uncommon sites are orange. Positive scores on PC1 are enriched for metastatic sites and negative scores on PC1 are enriched for uncommon sites.

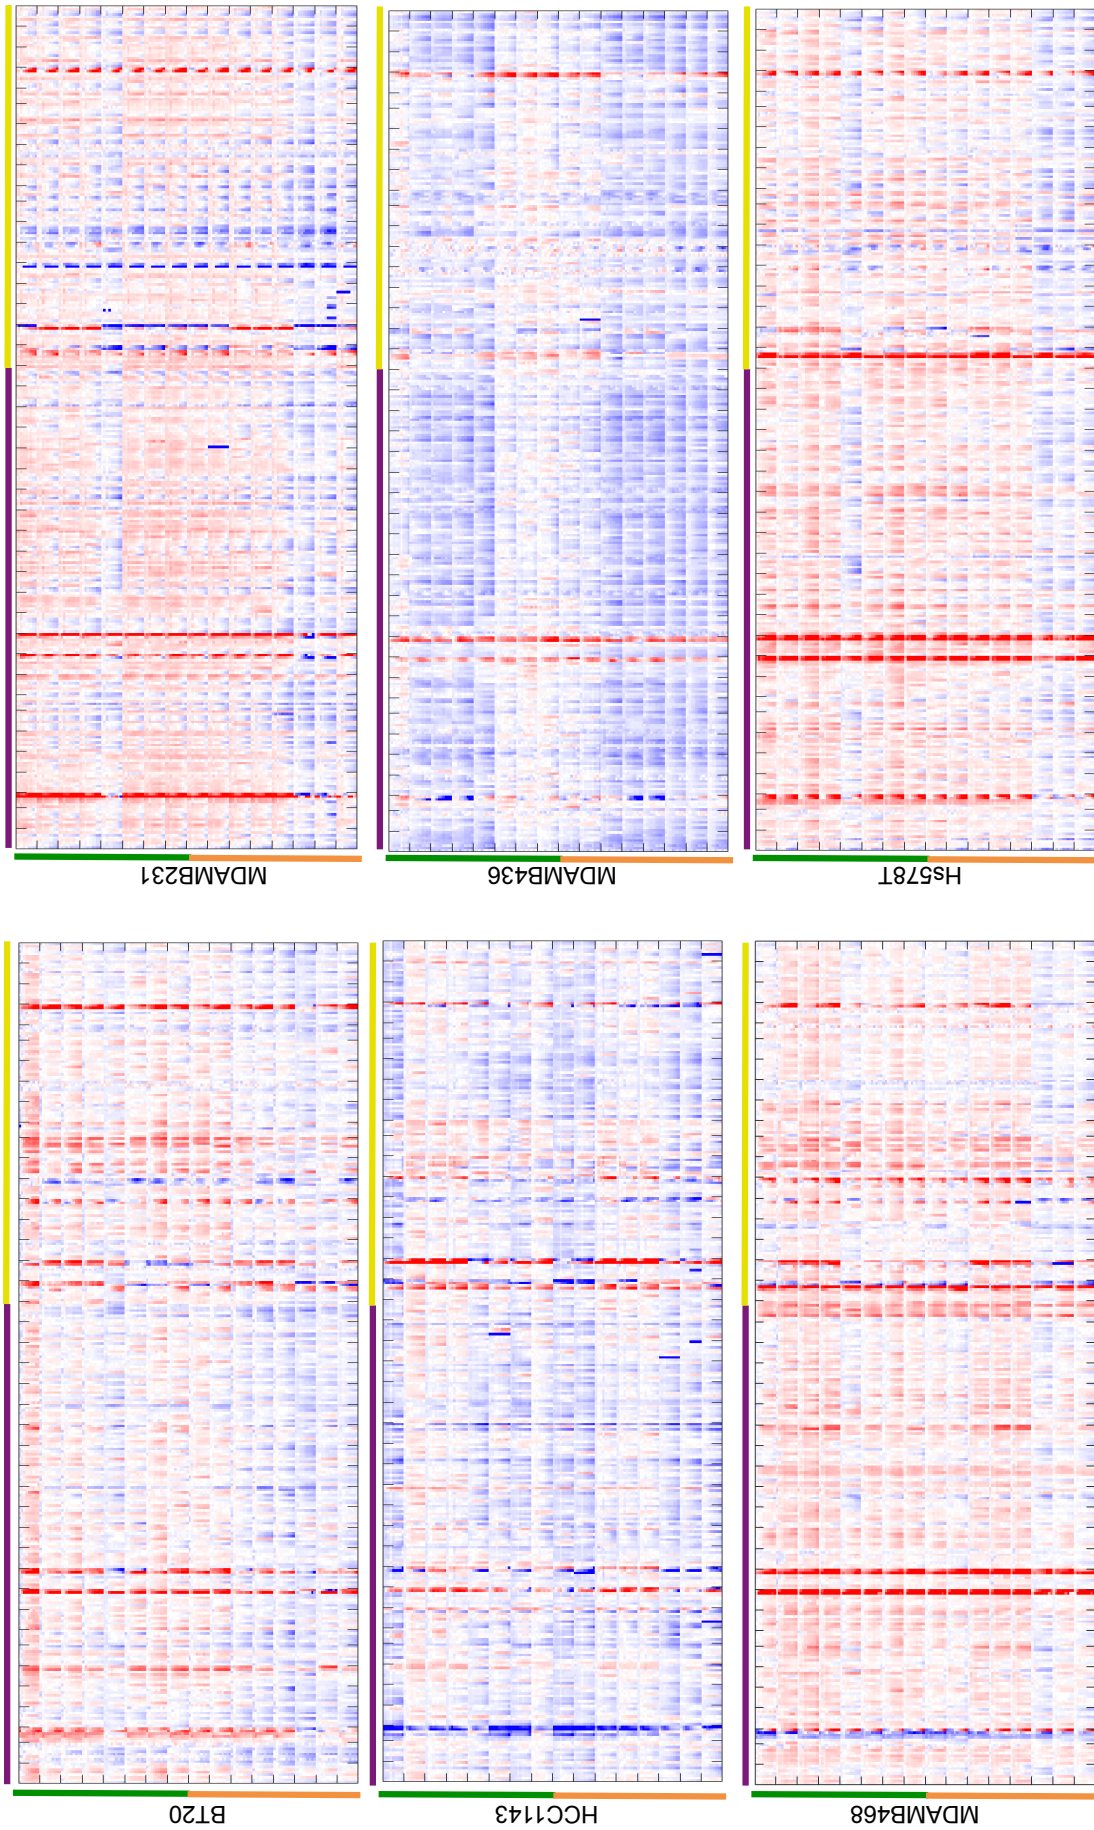

**Supplemental Figure 9: Cell line specific co-culture vs. mono-culture drug response ratios.** Data for each cell line are plotted with same order and color scale as in Figure 4B.
